# Supplementary material
Source: MDPI journal article supplement (https://www.mdpi.com/1999-4907/10/10/923)
Supplement: s1 [file s1]

Table S1 The species lists with Genbank accession numbers

| **Family** | **Genus** | **Species** | **rbcL** | **matK** | **ITS** | **Family** | **Genus** | **Species** | **rbcL** | **matK** | **ITS** |
| --- | --- | --- | --- | --- | --- | --- | --- | --- | --- | --- | --- |
| *Adoxaceae* | *Viburnum* | *Viburnum erosum* | *JF944773* | *n/a* | *n/a* | *Ericaceae* | *Lyonia* | *Lyonia ovalifolia* | *KP094889* | *KP093946* | *KP092600* |
| *Adoxaceae* | *Viburnum* | *Viburnum fordiae* | *JF944784* | *JF956798* | *n/a* | *Ericaceae* | *Rhododendron* | *Rhododendron championiae* | *MN583119* | *MN583079* | *MN579537* |
| *Adoxaceae* | *Viburnum* | *Viburnum setigerum* | *MN583124* | *MN583083* | *MN579542* | *Ericaceae* | *Rhododendron* | *Rhododendron latoucheae* | *HQ427145* | *HQ427298* | *AF393431* |
| *Akaniaceae* | *Bretschneidera* | *Bretschneidera sinensis* | *MN583088* | *MN583052* | *MN579516* | *Ericaceae* | *Rhododendron* | *Rhododendron levinei* | *KP094851* | *KP093908* | *KP092606* |
| *Altingiaceae* | *Liquidambar* | *Liquidambar acalycina* | *MN583108* | *MN583069* | *MN579528* | *Ericaceae* | *Rhododendron* | *Rhododendron mariesii* | *KP094785* | *KP093845* | *KP095998* |
| *Altingiaceae* | *Liquidambar* | *Liquidambar formosana* | *KP094609* | *KP093673* | *KP096078* | *Ericaceae* | *Rhododendron* | *Rhododendron moulmainense* | *KP094917* | *KP093974* | *KP092610* |
| *Anacardiaceae* | *Choerospondias* | *Choerospondias axillaris* | *KP094225* | *KP093315* | *KP093192* | *Ericaceae* | *Rhododendron* | *Rhododendron ovatum* | *HQ427144* | *HQ427297* | *AF432477* |
| *Anacardiaceae* | *Toxicodendron* | *Toxicodendron succedaneum* | *KP094605* | *KP093670* | *KP093196* | *Ericaceae* | *Rhododendron* | *Rhododendron simsii* | *KP094653* | *KP093716* | *KP095999* |
| *Anacardiaceae* | *Toxicodendron* | *Toxicodendron sylvestre* | *KP094719* | *KP093782* | *KP096072* | *Ericaceae* | *Rhododendron* | *Rhododendron stamineum* | *JF944060* | *KM606283* | *AF393435* |
| *Anacardiaceae* | *Toxicodendron* | *Toxicodendron vernicifluum* | *Ge131050* | *Ge131050* | *KF664208* | *Ericaceae* | *Vaccinium* | *Vaccinium bracteatum* | *KP094440* | *KP093519* | *KP092614* |
| *Aquifoliaceae* | *Ilex* | *Ilex buergeri* | *MN583102* | *n/a* | *AH007151* | *Ericaceae* | *Vaccinium* | *Vaccinium carlesii* | *MN583122* | *MN583082* | *MN583082* |
| *Aquifoliaceae* | *Ilex* | *Ilex chinensis* | *JF941987* | *JF954082* | *JF976681* | *Ericaceae* | *Vaccinium* | *Vaccinium mandarinorum* | *MN583123* | *KJ510927* | *MN579541* |
| *Aquifoliaceae* | *Ilex* | *Ilex ficoidea* | *KP094831* | *KP093889* | *KP092550* | *Erythroxylaceae* | *Erythroxylum* | *Erythroxylum sinense* | *KP095002* | *KP094049* | *KP092917* |
| *Aquifoliaceae* | *Ilex* | *Ilex formosana* | *MN583103* | *MN583064* | *MN579523* | *Euphorbiaceae* | *Macaranga* | *Macaranga tanarius* | *KU243026* | *AB233762* | *DQ866585* |
| *Aquifoliaceae* | *Ilex* | *Ilex kwangtungensis* | *KX897025* | *n/a* | *n/a* | *Euphorbiaceae* | *Mallotus* | *Mallotus philippensis* | *KP094431* | *KP093510* | *KP092939* |
| *Aquifoliaceae* | *Ilex* | *Ilex latifolia* | *KP094160* | *KP093253* | *n/a* | *Euphorbiaceae* | *Triadica* | *Triadica cochinchinensis* | *KR530159* | *KR531593* | *KR532678* |
| *Aquifoliaceae* | *Ilex* | *Ilex lohfauensis* | *KP094837* | *KP093895* | *KP092552* | *Euphorbiaceae* | *Vernicia* | *Vernicia montana* | *KP095026* | *KP094073* | *KP092945* |
| *Aquifoliaceae* | *Ilex* | *Ilex micrococca* | *KP094553* | *KP093625* | *n/a* | *Fabaceae* | *Albizia* | *Albizia julibrissin* | *GU135262* | *GU135096* | *FJ572041* |
| *Aquifoliaceae* | *Ilex* | *Ilex pubescens* | *KP094365* | *KP093447* | *KP092556* | *Fabaceae* | *Albizia* | *Albizia kalkora* | *HQ427141* | *HQ427295* | *n/a* |
| *Aquifoliaceae* | *Ilex* | *Ilex rotunda* | *KP094256* | *KP093343* | *KP092558* | *Fabaceae* | *Caesalpinia* | *Caesalpinia decapetala* | *MH657856* | *MH659371* | *MH710963* |
| *Aquifoliaceae* | *Ilex* | *Ilex suaveolens* | *HQ427139* | *HQ427293* | *n/a* | *Fabaceae* | *Dalbergia* | *Dalbergia hupeana* | *HQ427142* | *HQ427296* | *KM521378* |
| *Aquifoliaceae* | *Ilex* | *Ilex triflora* | *KP094397* | *n/a* | *n/a* | *Fabaceae* | *Lespedeza* | *Lespedeza davidii* | *MN583106* | *MN583067* | *n/a* |
| *Aquifoliaceae* | *Ilex* | *Ilex tutcheri* | *KP094853* | *KP093910* | *KP095987* | *Fabaceae* | *Ormosia* | *Ormosia henryi* | *MN583112* | *MN583072* | *n/a* |
| *Aquifoliaceae* | *Ilex* | *Ilex wilsonii* | *HQ427140* | *n/a* | *n/a* | *Fagaceae* | *Castanea* | *Castanea henryi* | *KJ440003* | *KJ510904* | *n/a* |
| *Araliaceae* | *Aralia* | *Aralia decaisneana* | *KP094595* | *KP093660* | *KP092533* | *Fagaceae* | *Castanopsis* | *Castanopsis carlesii* | *HQ427175* | *HQ427323* | *AY040372* |
| *Araliaceae* | *Dendropanax* | *Dendropanax dentiger* | *KP094881* | *KP093938* | *KP092536* | *Fagaceae* | *Castanopsis* | *Castanopsis eyrei* | *KP094427* | *KP093506* | *KP096017* |
| *Araliaceae* | *Kalopanax* | *Kalopanax septemlobus* | *MN583104* | *MN583065* | *MN579524* | *Fagaceae* | *Castanopsis* | *Castanopsis faberi* | *KP094529* | *KP093652* | *KP096018* |
| *Araliaceae* | *Schefflera* | *Schefflera heptaphylla* | *KP094267* | *KP093353* | *KP092540* | *Fagaceae* | *Castanopsis* | *Castanopsis fargesii* | *KP094312* | *KP093397* | *KP092746* |
| *Berberidaceae* | *Nandina* | *Nandina domestica* | *GU135271* | *GU134988* | *AY362430* | *Fagaceae* | *Castanopsis* | *Castanopsis lamontii* | *KP095020* | *KP094067* | *KP092750* |
| *Betulaceae* | *Carpinus* | *Carpinus londoniana* | *MN583092* | *AY211990* | *MN579518* | *Fagaceae* | *Castanopsis* | *Castanopsis sclerophylla* | *JF941211* | *JF953492* | *EF057106* |
| *Betulaceae* | *Carpinus* | *Carpinus viminea* | *HQ427161* | *AY212000* | *JF796531* | *Fagaceae* | *Castanopsis* | *Castanopsis tibetana* | *HQ427172* | *HQ427320* | *n/a* |
| *Boraginaceae* | *Ehretia* | *Ehretia longiflora* | *KP095108* | *KJ687555* | *KP093241* | *Fagaceae* | *Fagus* | *Fagus longipetiolata* | *JF941507* | *JF953716* | *AY232955* |
| *Celastraceae* | *Celastrus* | *Celastrus aculeatus* | *MN583093* | *MN583056* | *n/a* | *Fagaceae* | *Lithocarpus* | *Lithocarpus litseifolius* | *KP094891* | *KP093948* | *EF057112* |
| *Celastraceae* | *Euonymus* | *Euonymus alatus* | *MH657653* | *MH659217* | *MH710860* | *Fagaceae* | *Lithocarpus* | *Lithocarpus skanianus* | *MN583109* | *MN583070* | *MN579529* |
| *Celastraceae* | *Euonymus* | *Euonymus centidens* | *HQ427247* | *n/a* | *n/a* | *Fagaceae* | *Quercus* | *Quercus acutissima* | *MF349625* | *n/a* | *n/a* |
| *Celastraceae* | *Euonymus* | *Euonymus euscaphis* | *MN583095* | *MN583058* | *n/a* | *Fagaceae* | *Quercus* | *Quercus chenii* | *MN583118* | *MN583078* | *KX838103* |
| *Celastraceae* | *Euonymus* | *Euonymus fortunei* | *MN583096* | *MN583059* | *MH703361* | *Fagaceae* | *Quercus* | *Quercus ciliaris* | *HQ427169* | *HQ427318* | *n/a* |
| *Celastraceae* | *Euonymus* | *Euonymus myrianthus* | *HQ427245* | *HQ427388* | *HQ393721* | *Fagaceae* | *Quercus* | *Quercus glauca* | *KP094994* | *HQ427316* | *KP09275* |
| *Celastraceae* | *Euonymus* | *Euonymus nitidus* | *KP095097* | *KP094132* | *KP092574* | *Fagaceae* | *Quercus* | *Quercus multinervis* | *MH657763* | *MH659316* | *n/a* |
| *Clusiaceae* | *Garcinia* | *Garcinia multiflora* | *KP095024* | *KP094071* | *KP092915* | *Fagaceae* | *Quercus* | *Quercus myrsinifolia* | *MH657762* | *MH659315* | *AF098414* |
| *Cornaceae* | *Alangium* | *Alangium chinense* | *KP094707* | *KP093770* | *KP095991* | *Fagaceae* | *Quercus* | *Quercus sessilifolia* | *KJ688123* | *AB060068* | *n/a* |
| *Cornaceae* | *Alangium* | *Alangium kurzii* | *KP095054* | *KP094100* | *KP092580* | *Hamamelidaceae* | *Loropetalum* | *Loropetalum chinense* | *KP094442* | *KP093521* | *KP096080* |
| *Cornaceae* | *Cornus* | *Cornus controversa* | *AF190433* | *n/a* | *n/a* | *Hydrangeaceae* | *Hydrangea* | *Hydrangea macrophylla* | *MN583101* | *MN583063* | *n/a* |
| *Cornaceae* | *Cornus* | *Cornus kousa* | *HQ427237* | *HQ427380* | *DQ340554* | *Iteaceae* | *Itea* | *Itea chinensis* | *KP094374* | *KP093455* | *KP092691* |
| *Cornaceae* | *Nyssa* | *Nyssa sinensis* | *HQ427178* | *HQ427326* | *JQ280760* | *Juglandaceae* | *Cyclocarya* | *Cyclocarya paliurus* | *KP088561* | *KP089039* | *AF179583* |
| *Cupressaceae* | *Cunninghamia* | *Cunninghamia lanceolata* | *KP094408* | *KP093487* | *KP093073* | *Juglandaceae* | *Engelhardia* | *Engelhardia roxburghiana* | *KP094931* | *KR530781* | *KP092758* |
| *Daphniphyllaceae* | *Daphniphyllum* | *Daphniphyllum calycinum* | *KP094298* | *KP093384* | *KP093231* | *Juglandaceae* | *Platycarya* | *Platycarya strobilacea* | *MF349303* | *n/a* | *n/a* |
| *Daphniphyllaceae* | *Daphniphyllum* | *Daphniphyllum macropodum* | *MH658775* | *MH660239* | *MH711685* | *Lamiaceae* | *Callicarpa* | *Callicarpa formosana* | *KP094561* | *n/a* | *n/a* |
| *Daphniphyllaceae* | *Daphniphyllum* | *Daphniphyllum oldhamii* | *KP095017* | *KP094064* | *KP095969* | *Lamiaceae* | *Callicarpa* | *Callicarpa giraldii* | *HQ427184* | *HQ427332* | *FJ593347* |
| *Ebenaceae* | *Diospyros* | *Diospyros glaucifolia* | *GU471698* | *HQ427382* | *KU378710* | *Lamiaceae* | *Callicarpa* | *Callicarpa kwangtungensis* | *KP095060* | *KP094106* | *n/a* |
| *Ebenaceae* | *Diospyros* | *Diospyros lotus* | *Ge130831* | *Ge130831* | *Ge130831* | *Lamiaceae* | *Callicarpa* | *Callicarpa rubella* | *MN583089* | *MN583053* | *n/a* |
| *Ebenaceae* | *Diospyros* | *Diospyros morrisiana* | *KP094463* | *KP093536* | *KU378741* | *Lamiaceae* | *Clerodendrum* | *Clerodendrum cyrtophyllum* | *KP094168* | *KP093261* | *KP092826* |
| *Elaeagnaceae* | *Elaeagnus* | *Elaeagnus pungens* | *MN583094* | *MN583057* | *MN579519* | *Lauraceae* | *Cinnamomum* | *Cinnamomum austrosinense* | *KJ688062* | *n/a* | *n/a* |
| *Elaeocarpaceae* | *Elaeocarpus* | *Elaeocarpus chinensis* | *KP094452* | *KP093526* | *KP096059* | *Lauraceae* | *Cinnamomum* | *Cinnamomum micranthum* | *KJ688068* | *KJ687507* | *KY271520* |
| *Elaeocarpaceae* | *Elaeocarpus* | *Elaeocarpus duclouxii* | *KP094969* | *KP094019* | *KP096061* | *Lauraceae* | *Cinnamomum* | *Cinnamomum porrectum* | *KJ439994* | *KJ510895* | *KX546421* |
| *Elaeocarpaceae* | *Elaeocarpus* | *Elaeocarpus japonicus* | *KP094875* | *KP093932* | *KP096062* | *Lauraceae* | *Cinnamomum* | *Cinnamomum subavenium* | *HQ427266* | *HQ427408* | *GU598529* |
| *Elaeocarpaceae* | *Elaeocarpus* | *Elaeocarpus sylvestris* | *KP094624* | *KP093687* | *KP096063* | *Lauraceae* | *Lindera* | *Lindera aggregata* | *KP094489* | *KP093562* | *AB470487* |
| *Elaeocarpaceae* | *Sloanea* | *Sloanea sinensis* | *KP094628* | *KP093691* | *KP093066* | *Lauraceae* | *Lindera* | *Lindera communis* | *KP094261* | *KP093347* | *KP092868* |
| *Ericaceae* | *Enkianthus* | *Enkianthus quinqueflorus* | *KP094661* | *KP093724* | *KP092598* | *Lauraceae* | *Lindera* | *Lindera erythrocarpa* | *MN583107* | *MN583068* | *MN579527* |
| *Lauraceae* | *Lindera* | *Lindera glauca* | *HQ427265* | *HQ427407* | *AB470488* | *Rosaceae* | *Photinia* | *Photinia bodinieri* | *MH657886* | *MH659392* | *n/a* |
| *Lauraceae* | *Lindera* | *Lindera reflexa* | *HQ427264* | *HQ427406* | *KX546444* | *Rosaceae* | *Photinia* | *Photinia glabra* | *HQ427205* | *HQ427354* | *FJ796905* |
| *Lauraceae* | *Litsea* | *Litsea coreana* | *MN583110* | *MN583071* | *MN579530* | *Rosaceae* | *Photinia* | *Photinia parvifolia* | *HQ427206* | *HQ427355* | *FJ810015* |
| *Lauraceae* | *Litsea* | *Litsea cubeba* | *KP094359* | *KP093441* | *KP092872* | *Rosaceae* | *Photinia* | *Photinia prunifolia* | *KP094583* | *KP093650* | *KP093144* |
| *Lauraceae* | *Litsea* | *Litsea elongata* | *KR529571* | *KR531066* | *DQ120606* | *Rosaceae* | *Photinia* | *Photinia schneideriana* | *MN583115* | *MN583075* | *MN579534* |
| *Lauraceae* | *Machilus* | *Machilus leptophylla* | *KX547026* | *JF954553* | *EF538697* | *Rosaceae* | *Prunus* | *Prunus phaeosticta* | *HQ235517* | *HQ415272* | *EU669095* |
| *Lauraceae* | *Machilus* | *Machilus nanmu* | *KR529622* | *KR531113* | *HQ697189* | *Rosaceae* | *Prunus* | *Prunus serrulata* | *HQ235544* | *GU363780* | *AF318721* |
| *Lauraceae* | *Machilus* | *Machilus oreophila* | *JF942467* | *JF954556* | *AY934898* | *Rosaceae* | *Prunus* | *Prunus spinulosa* | *HQ427210* | *HQ427357* | *AF411513* |
| *Lauraceae* | *Machilus* | *Machilus pauhoi* | *HQ427276* | *HQ427418* | *EF538695* | *Rosaceae* | *Pyrus* | *Pyrus betulifolia* | *JQ391378* | *n/a* | *n/a* |
| *Lauraceae* | *Machilus* | *Machilus phoenicis* | *KP094493* | *KP093566* | *KP092885* | *Rosaceae* | *Rhaphiolepis* | *Rhaphiolepis indica* | *KP094361* | *KP093443* | *KP093148* |
| *Lauraceae* | *Machilus* | *Machilus thunbergii* | *KP094893* | *KP093950* | *KP092887* | *Rosaceae* | *Sorbus* | *Sorbus folgneri* | *HQ427212* | *HQ427359* | *KT345403* |
| *Lauraceae* | *Machilus* | *Machilus velutina* | *KP094761* | *KP093822* | *KP092888* | *Rubiaceae* | *Aidia* | *Aidia canthioides* | *HQ415144* | *n/a* | *KP092776* |
| *Lauraceae* | *Neolitsea* | *Neolitsea aurata* | *KP094861* | *KP093918* | *n/a* | *Rubiaceae* | *Aidia* | *Aidia cochinchinensis* | *HQ427198* | *HQ427347* | *n/a* |
| *Lauraceae* | *Neolitsea* | *Neolitsea chui* | *KP094808* | *KP093868* | *n/a* | *Rubiaceae* | *Damnacanthus* | *Damnacanthus giganteus* | *JX412458* | *n/a* | *n/a* |
| *Lauraceae* | *Neolitsea* | *Neolitsea levinei* | *JF942619* | *JF954713* | *JF977150* | *Rubiaceae* | *Diplospora* | *Diplospora dubia* | *KP094341* | *KP093423* | *KP096027* |
| *Lauraceae* | *Phoebe* | *Phoebe bournei* | *MN583113* | *MN583073* | *MN579532* | *Rubiaceae* | *Emmenopterys* | *Emmenopterys henryi* | *KP768944* | *Q886* | *KP347147* |
| *Lauraceae* | *Sassafras* | *Sassafras tzumu* | *HQ427277* | *HQ427419* | *GU082375* | *Rubiaceae* | *Gardenia* | *Gardenia jasminoides* | *KP095112* | *KP094144* | *KP092786* |
| *Magnoliaceae* | *Magnolia* | *Magnolia chapensis* | *KJ439982* | *KJ510883* | *DQ234270* | *Rubiaceae* | *Lasianthus* | *Lasianthus chinensis* | *KP094327* | *KP093411* | *KP092790* |
| *Magnoliaceae* | *Magnolia* | *Magnolia cylindrica* | *KU853576* | *KP089148* | *n/a* | *Rubiaceae* | *Lasianthus* | *Lasianthus japonicus* | *MN583105* | *MN583066* | *MN579525* |
| *Magnoliaceae* | *Magnolia* | *Magnolia denudata* | *KU853559* | *KU853515* | *EU593545* | *Rubiaceae* | *Mussaenda* | *Mussaenda pubescens* | *JF942576* | *JF954668* | *KM005495* |
| *Magnoliaceae* | *Magnolia* | *Magnolia figo* | *KP094404* | *KP093483* | *KP095620* | *Rubiaceae* | *Tarenna* | *Tarenna mollissima* | *KP095098* | *KP094133* | *KP092800* |
| *Magnoliaceae* | *Magnolia* | *Magnolia fordiana* | *HQ427274* | *HQ427416* | *n/a* | *Rutaceae* | *Tetradium* | *Tetradium glabrifolium* | *HQ427255* | *HQ427398* | *KM506899* |
| *Magnoliaceae* | *Magnolia* | *Magnolia foveolata* | *KP094417* | *KP093496* | *KP095622* | *Sabiaceae* | *Meliosma* | *Meliosma myriantha* | *MN583111* | *n/a* | *MN579531* |
| *Magnoliaceae* | *Magnolia* | *Magnolia maudiae* | *KP094420* | *KP093499* | *KP095623* | *Sabiaceae* | *Meliosma* | *Meliosma oldhamii* | *HQ427213* | *HQ427360* | *KP900401* |
| *Magnoliaceae* | *Magnolia* | *Magnolia odora* | *KP094968* | *KP094018* | *DQ674740* | *Sabiaceae* | *Meliosma* | *Meliosma rigida* | *KP094292* | *KP093378* | *KP093185* |
| *Melastomataceae* | *Blastus* | *Blastus cochinchinensis* | *KP094575* | *KP093645* | *KM521838* | *Sapindaceae* | *Acer* | *Acer campbellii* | *JF940629* | *JF952995* | *n/a* |
| *Meliaceae* | *Toona* | *Toona ciliata* | *KP752377* | *n/a* | *n/a* | *Sapindaceae* | *Acer* | *Acer cordatum* | *MN583084* | *MN583048* | *MN579512* |
| *Moraceae* | *Ficus* | *Ficus formosana* | *KP094971* | *KP093611* | *KP093101* | *Sapindaceae* | *Acer* | *Acer davidii* | *JF940614* | *JF952981* | *AF401144* |
| *Moraceae* | *Ficus* | *Ficus heteromorpha* | *JF941536* | *JQ773632* | *KY388621* | *Sapindaceae* | *Acer* | *Acer fabri* | *KP094587* | *KP093654* | *KP093223* |
| *Moraceae* | *Ficus* | *Ficus pandurata* | *KP094218* | *KP093308* | *KP093110* | *Sapindaceae* | *Acer* | *Acer lucidum* | *MN583085* | *MN583049* | *n/a* |
| *Moraceae* | *Ficus* | *Ficus sarmentosa* | *KP094675* | *KP093738* | *KP093113* | *Sapindaceae* | *Acer* | *Acer oliverianum* | *KU902593* | *KX264950* | *KU902485* |
| *Moraceae* | *Ficus* | *Ficus variolosa* | *KP094433* | *KP093512* | *KY388616* | *Sapindaceae* | *Acer* | *Acer palmatum* | *MN583086* | *MN583050* | *MN579514* |
| *Moraceae* | *Maclura* | *Maclura cochinchinensis* | *KR529630* | *KR531121* | *KU855719* | *Sapindaceae* | *Eurycorymbus* | *Eurycorymbus cavaleriei* | *FN599449* | *EU720565* | *n/a* |
| *Myricaceae* | *Myrica* | *Myrica rubra* | *KP094905* | *KP093962* | *KP092762* | *Schoepfiaceae* | *Schoepfia* | *Schoepfia chinensis* | *KP095090* | *KP094127* | *KP093189* |
| *Myrtaceae* | *Syzygium* | *Syzygium buxifolium* | *KP094793* | *KP093853* | *KP093045* | *Schoepfiaceae* | *Schoepfia* | *Schoepfia jasminodora* | *KP094778* | *n/a* | *n/a* |
| *Oleaceae* | *Fraxinus* | *Fraxinus insularis* | *HQ427187* | *HQ427335* | *n/a* | *Staphyleaceae* | *Euscaphis* | *Euscaphis japonica* | *MN583099* | *MN583062* | *MN579521* |
| *Oleaceae* | *Ligustrum* | *Ligustrum quihoui* | *JF830426* | *JF954383* | *KC305506* | *Staphyleaceae* | *Turpinia* | *Turpinia arguta* | *KP094456* | *KP093530* | *KP092585* |
| *Pentaphylacaceae* | *Adinandra* | *Adinandra bockiana* | *MN583087* | *MN583051* | *MN579515* | *Staphyleaceae* | *Turpinia* | *Turpinia montana* | *KR530176* | *KR531609* | *KR532691* |
| *Pentaphylacaceae* | *Adinandra* | *Adinandra millettii* | *HQ427223* | *HQ427369* | *AY626848* | *Styracaceae* | *Alniphyllum* | *Alniphyllum fortunei* | *KP095010* | *KP094057* | *AF396437* |
| *Pentaphylacaceae* | *Eurya* | *Eurya distichophylla* | *KP094555* | *KP093627* | *KP092634* | *Styracaceae* | *Halesia* | *Halesia macgregorii* | *MN583100* | *n/a* | *MN579522* |
| *Pentaphylacaceae* | *Eurya* | *Eurya hebeclados* | *KP094870* | *KP093927* | *AY626865* | *Styracaceae* | *Pterostyrax* | *Pterostyrax corymbosus* | *MN583117* | *MN583077* | *MN579536* |
| *Pentaphylacaceae* | *Eurya* | *Eurya japonica* | *MN583097* | *MN583060* | *MN579520* | *Styracaceae* | *Styrax* | *Styrax confusus* | *KP094976* | *KP094024* | *KP092687* |
| *Pentaphylacaceae* | *Eurya* | *Eurya loquaiana* | *KP094965* | *KP094015* | *KP092640* | *Styracaceae* | *Styrax* | *Styrax japonicus* | *MH657773* | *n/a* | *AF327465* |
| *Pentaphylacaceae* | *Eurya* | *Eurya muricata* | *HQ427228* | *HQ427373* | *AY626872* | *Styracaceae* | *Styrax* | *Styrax suberifolius* | *KP095008* | *KP094055* | *KP092689* |
| *Pentaphylacaceae* | *Eurya* | *Eurya nitida* | *MN583098* | *MN583061* | *AY626874* | *Symplocaceae* | *Symplocos* | *Symplocos adenopus* | *KP095093* | *HQ415340* | *AY336332* |
| *Pentaphylacaceae* | *Ternstroemia* | *Ternstroemia gymnanthera* | *KP095109* | *KP094142* | *AY626888* | *Symplocaceae* | *Symplocos* | *Symplocos anomala* | *KR530053* | *KR531497* | *KR532595* |
| *Phyllanthaceae* | *Antidesma* | *Antidesma bunius* | *KP094955* | *KR530363* | *KP092950* | *Symplocaceae* | *Symplocos* | *Symplocos cochinchinensis* | *KP094415* | *KP093494* | *KP092675* |
| *Phyllanthaceae* | *Antidesma* | *Antidesma japonicum* | *KP094444* | *KP093522* | *KP092953* | *Symplocaceae* | *Symplocos* | *Symplocos groffii* | *KR530062* | *KR531504* | *KR532602* |
| *Pinaceae* | *Pinus* | *Pinus massoniana* | *KP094535* | *KP093607* | *KP096065* | *Symplocaceae* | *Symplocos* | *Symplocos heishanensis* | *MN583121* | *MN583081* | *MN579539* |
| *Pinaceae* | *Pinus* | *Pinus taiwanensis* | *JF943444* | *JF955539* | *JN046365* | *Symplocaceae* | *Symplocos* | *Symplocos lancifolia* | *KP094152* | *KP093245* | *KP092679* |
| *Podocarpaceae* | *Nageia* | *Nageia nagi* | *KP094190* | *KP093283* | *KP093068* | *Symplocaceae* | *Symplocos* | *Symplocos paniculata* | *HQ427234* | *HQ427378* | *AY336263* |
| *Polygalaceae* | *Polygala* | *Polygala fallax* | *MN583116* | *MN583076* | *MN579535* | *Symplocaceae* | *Symplocos* | *Symplocos stellaris* | *HQ427236* | *HQ427379* | *AY336329* |
| *Primulaceae* | *Maesa* | *Maesa japonica* | *KP094959* | *KP094009* | *KP096000* | *Symplocaceae* | *Symplocos* | *Symplocos sumuntia* | *HQ427232* | *HQ427377* | *AY336322* |
| *Primulaceae* | *Myrsine* | *Myrsine africana* | *KJ595679* | *JX518081* | *EU886863* | *Tapisciaceae* | *Tapiscia* | *Tapiscia sinensis* | *AY646112* | *n/a* | *n/a* |
| *Primulaceae* | *Myrsine* | *Myrsine seguinii* | *KP094789* | *KP093849* | *KP092670* | *Taxaceae* | *Taxus* | *Taxus wallichiana* | *HM591027* | *HM590983* | *JX188589* |
| *Proteaceae* | *Helicia* | *Helicia cochinchinensis* | *KP094545* | *KP093617* | *KP093077* | *Theaceae* | *Camellia* | *Camellia brevistyla* | *MN583090* | *MN583054* | *EU579683* |
| *Proteaceae* | *Helicia* | *Helicia reticulata* | *KP094685* | *KP093748* | *KP093079* | *Theaceae* | *Camellia* | *Camellia euryoides* | *KP094741* | *KP093804* | *KP092646* |
| *Rosaceae* | *Eriobotrya* | *Eriobotrya cavaleriei* | *KP094617* | *KP093681* | *KP093136* | *Theaceae* | *Camellia* | *Camellia oleifera* | *KP095028* | *KP094075* | *n/a* |
| *Rosaceae* | *Malus* | *Malus hupehensis* | *MH657799* | *MH659341* | *JQ392455* | *Theaceae* | *Camellia* | *Camellia salicifolia* | *KJ688037* | *n/a* | *EU579765* |
| *Rosaceae* | *Malus* | *Malus sieboldii* | *JQ391372* | *AF30918* | *JQ392454* | *Theaceae* | *Camellia* | *Camellia sinensis* | *MN583091* | *MN583055* | *MN579517* |
| *Rosaceae* | *Photinia* | *Photinia beauverdiana* | *MN583114* | *MN583074* | *MN579533* | *Theaceae* | *Schima* | *Schima argentea* | *AF380053* | *AF380096* | *HM100438* |
| *Theaceae* | *Schima* | *Schima superba* | *KP094250* | *KP093338* | *KP092645* | *Theaceae* | *Stewartia* | *Stewartia sinensis* | *AF380061* | *KJ198005* | *AY070323* |

*: voucher number

Table S2 The correlation coefficients of the original variables with each PC axis.

| **(A) PCA for climatic variables** | PCA1 | PCA2 | PCA3 |
| --- | --- | --- | --- |
| Annual mean temperature (BIO1) | 0.2578 | 0.7138 | -0.0217 |
| Temperature seasonality (BIO4) | 0.9284 | 0.0260 | -0.0061 |
| Minimum temperature of the coldest month (BIO6) | 0.7298 | 0.2515 | -0.0248 |
| Temperature annual range (BIO7) | 0.9103 | 0.0501 | -0.0118 |
| Annual precipitation (BIO12) | 0.6886 | 0.2486 | 0.0552 |
| **(B) PCA for edaphic variables** | PCA1 | PCA2 | PCA3 |
| Organic | 0.9127 | 0.0049 | 0.0268 |
| Nitrogen (N) | 0.8891 | 0.0318 | 0.0083 |
| Phosphorus (P) | 0.0112 | 0.8047 | 0.1807 |
| Available Phosphorus (AP) | 0.0889 | 0.7171 | 0.1669 |
| Ph | 0.7520 | 0.0080 | 0.0076 |

Table S3 Pairwise t-test for the *S.E.S.Dpw*and *S.E.S.Dnn* between each pair of plots by three different phylogenies

|  | | Phylogeny Ⅰ | Phylogeny Ⅱ | t | *d.f.* | P-value | Mean difference |
| --- | --- | --- | --- | --- | --- | --- | --- |
| *S.E.S.Dpw* | Abundance weighted | Phylomatic | unconstraint | 4.802 | 2356 | <0.0001 | 0.7519 |
| Phylomatic | Constraint | 6.211 | 2356 | <0.0001 | 0.7054 |
| Unconstraint | Constraint | 1.223 | 2356 | 0.2241 | 0.5155 |
| Presence-absence | Phylomatic | unconstraint | 3.9386 | 2356 | <0.0001 | 0.8493 |
| Phylomatic | Constraint | 4.493 | 2356 | <0.0001 | 0.82265 |
| Unconstraint | Constraint | 0.7154 | 2356 | <0.0001 | 0.6766 |
| *S.E.S.Dnn* | Abundance weighted | Phylomatic | unconstraint | -2.914 | 2356 | 0.0036 | -1.507 |
| Phylomatic | Constraint | -3.653 | 2356 | 0.0002648 | -1.4721 |
| Unconstraint | Constraint | -0.824 | 2356 | 0.4098 | -1.3507 |
| Presence-absence | Phylomatic | unconstraint | -1.399 | 2356 | 0.1618 | -0.5565 |
| Phylomatic | Constraint | -2.126 | 2356 | 0.0336 | -0.5183 |
| Unconstraint | Constraint | -0.744 | 2356 | 0.4565 | -0.4509 |

Table S4 The mantel test between phylogenetic beta diversity and geographical and environmental distance for forests plots using different phylogenetic approaches.

| phylogeny | Phylogenetic beta diversity metrics | Geographical distance | The change of soil | The change of elevation | The change of climate |
| --- | --- | --- | --- | --- | --- |
| phylomatic | Dnn. abundance weighted | 0.1879** | 0.194 | **0.1582*** | 0.1357** |
| Dnn presence-absence | 0.127* | 0.2312* | 0.0817 | 0.2035** |
| Dpw abunance weighted | 0.3148** | 0.249** | 0.2166* | 0..2061** |
| Dpw presence-absence | 0.3471** | 0.3345** | **0.1358*** | 0.1612** |
| Unconstraint barcoding tree | Dnn. abundance weighted | 0.1781** | 0.1582 | 0.0703 | 0.1139* |
| Dnn presence-absence | 0.1694** | 0.2709* | 0.0549 | 0.175** |
| Dpw abunance weighted | 0.1734** | 0.1709* | 0.1352* | 0.1024** |
| Dpw presence-absence | 0.2433** | 0.2708* | 0.0698 | **0.0656** |

The asterisk ** and * indicate the significance at the levels of p <0.001 and 0.05 respectively.

| phylogeny | vaaibles | Ses. Dnn.aw | Ses.Dnn.bin | Ses. Dpw.aw | Ses.Dpw.bin |
| --- | --- | --- | --- | --- | --- |
| Phylomatic | Geographical distance | 6.217** | 3.536** | 0.324 | **0.188** |
| Edaphic distance | 0.206 | 0.395 | 4.277** | 2.611** |
| Climatic distance | 3.771** | 0.65** | 0.417 | 6.67** |
| Geographical distance +Edaphic distance | 0.008 | 0.026 | **0.196** | 0.016 |
| Geographical distance + Climatic distance | 0.359 | 0.095 | 1.642** | 0.633* |
| Edaphic distance + Climatic distance | 1.43** | 1.711** | 0.694* | 0.834* |
| Geographical distance +Edaphic distance  + Climatic distance | 0.029 | 0.054 | 0.111 | 0.01 |
| Residuals | 88.36 | 93.53 | 92.34 | 94.59 |
| Unconstraint barcoding  tree | Geographical distance | 6.851** | 2.551** | 0.25 | 0.806** |
| Edaphic distance | **0.577*** | 0.0001 | 2.719** | 4.368** |
| Climatic distance | 3.967** | 1.074** | 0.005 | 3.039** |
| Geographical distance +Edaphic distance | **0.517*** | 0.289 | 0.811* | 0.1199 |
| Geographical distance + Climatic distance | 0.065 | 0.1 | 1.918** | 1.927* |
| Edaphic distance + Climatic distance | 1.82** | 0.881** | **0.4** | **0.291** |
| Geographical distance +Edaphic distance  + Climatic distance | 0.096 | **0.58*** | 0.11 | 0.01 |
| Residuals | 86.11 | 84.62 | 93.79 | 89.44 |

Table S5 Results from the permutational multivariate analysis of variance using phylogenetic beta diversity indices by “adonis” when using different phylogenetic approaches

The asterisk ** and * indicate the significance at the levels of p <0.001 and 0.05 respectively.


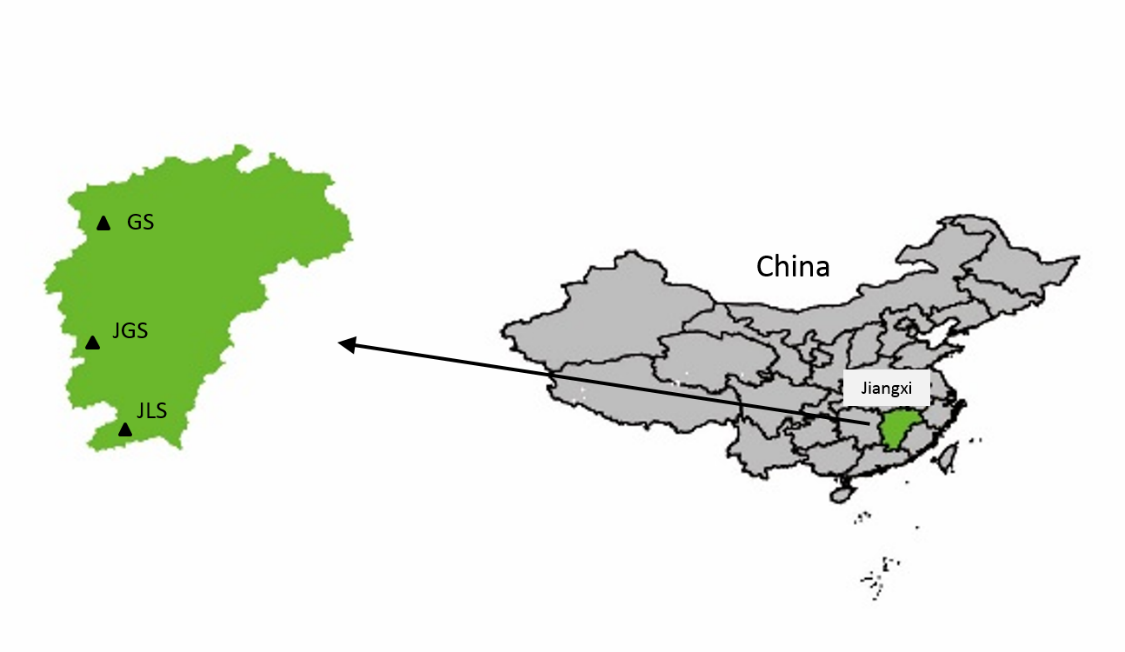


Fig. S1 Location for three mountains in mid-subtropical evergreen broad-leaved forests of China


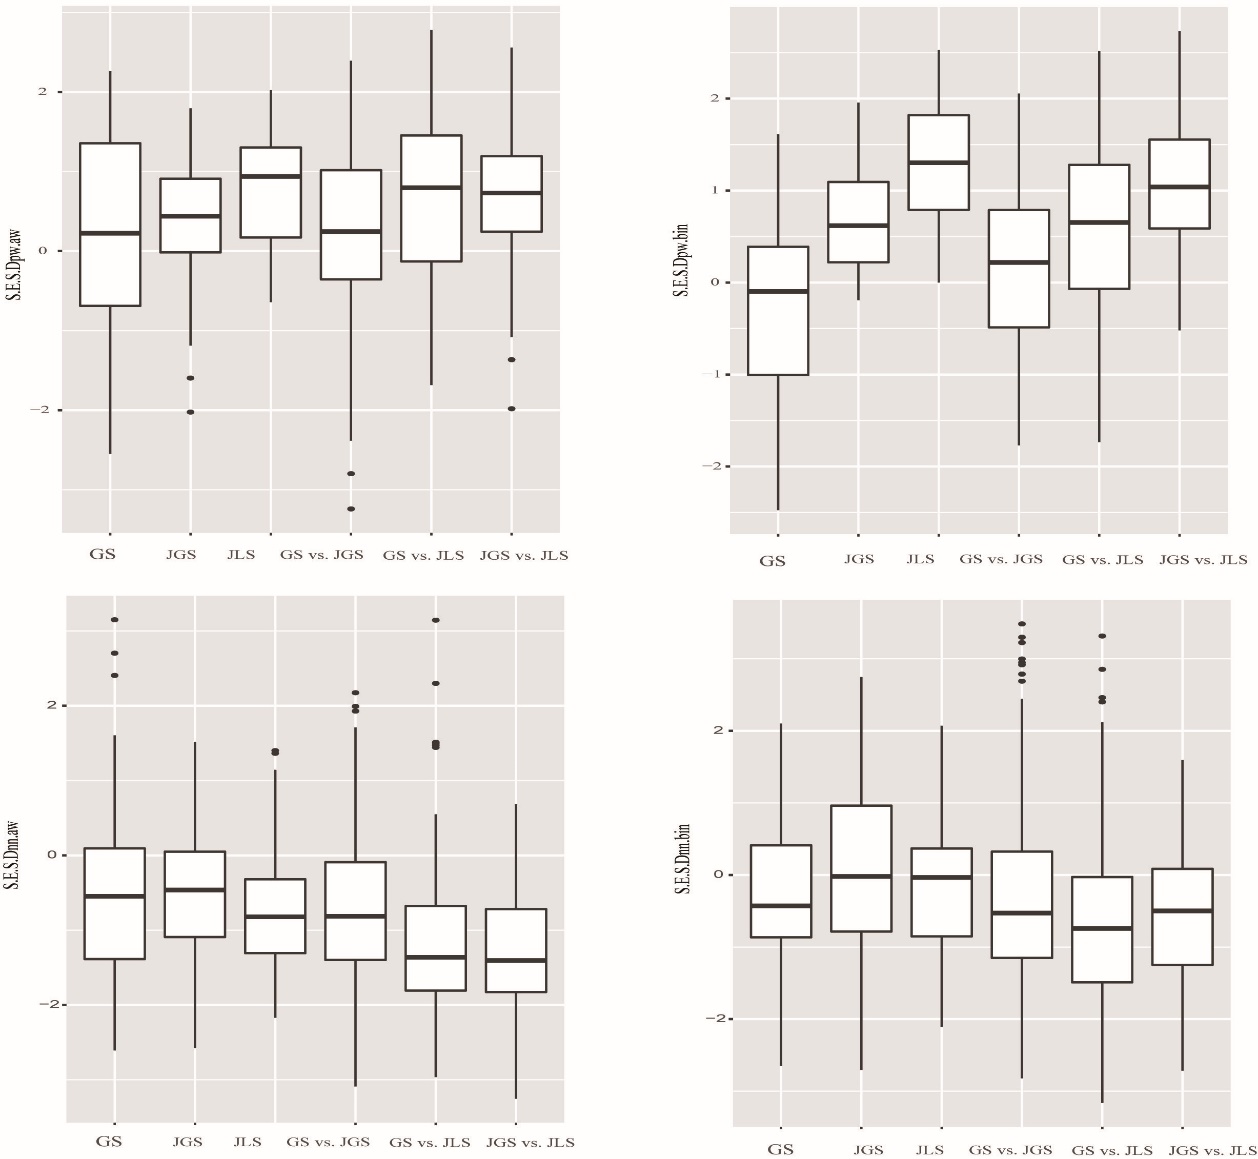


Fig. S2 Dispersion of the four phylogenetic β-metrics bases on un-constrained barcoding tree for each mountain and between different mountains


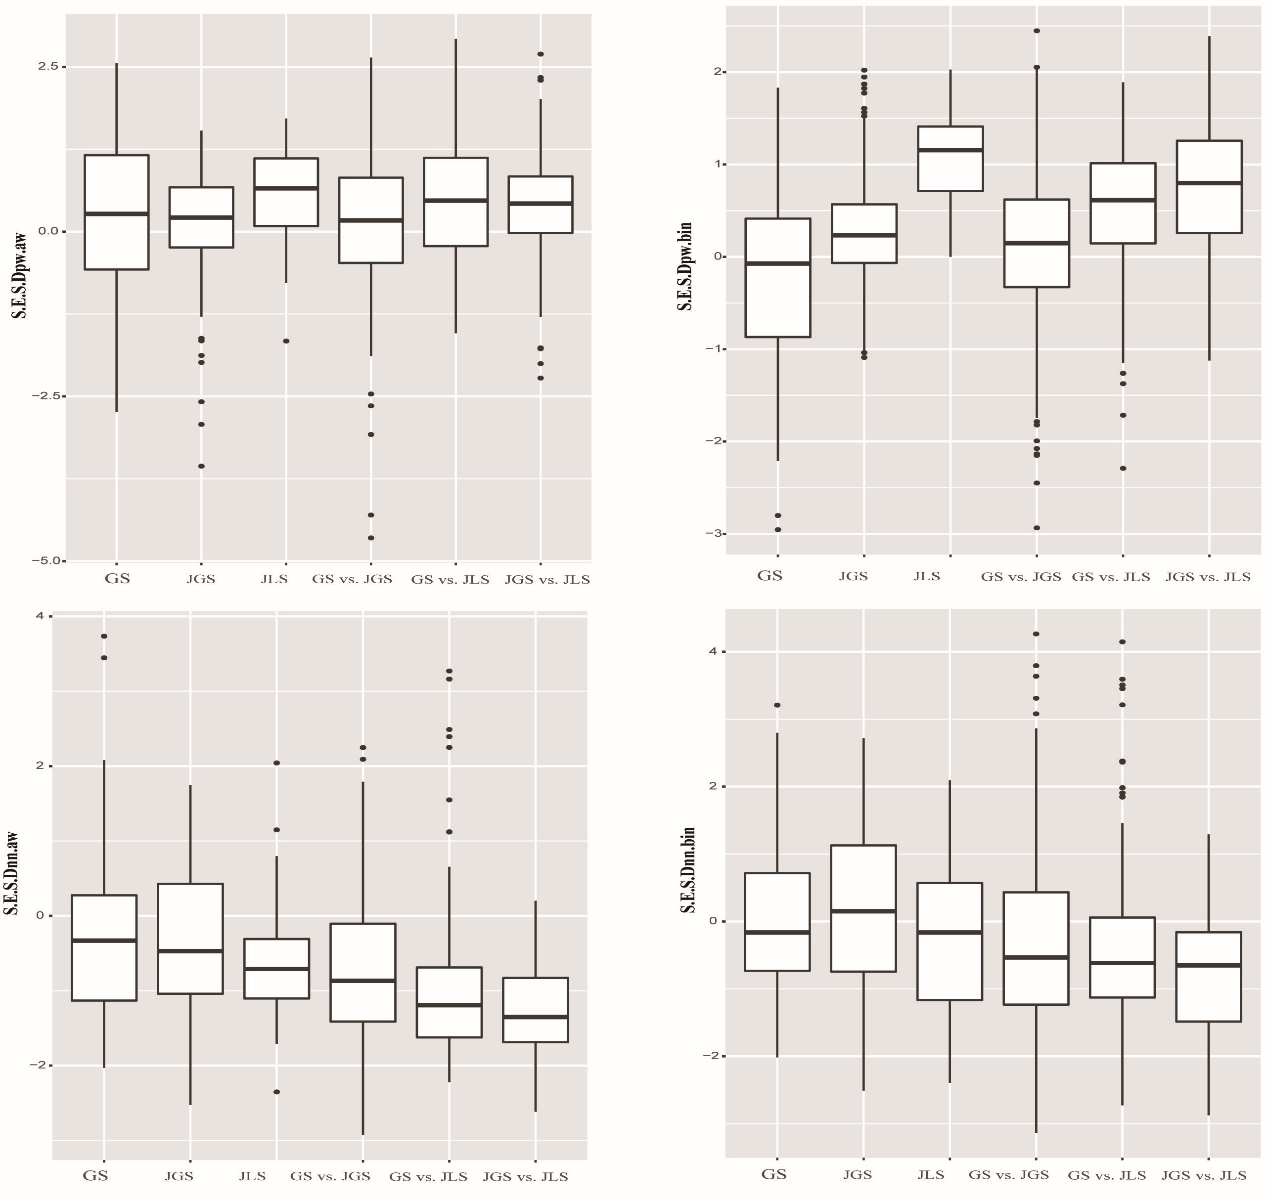


Fig. S3 Dispersion of the four phylogenetic β-metrics based on Phylomatic-generated tree for each mountain and between different mountains


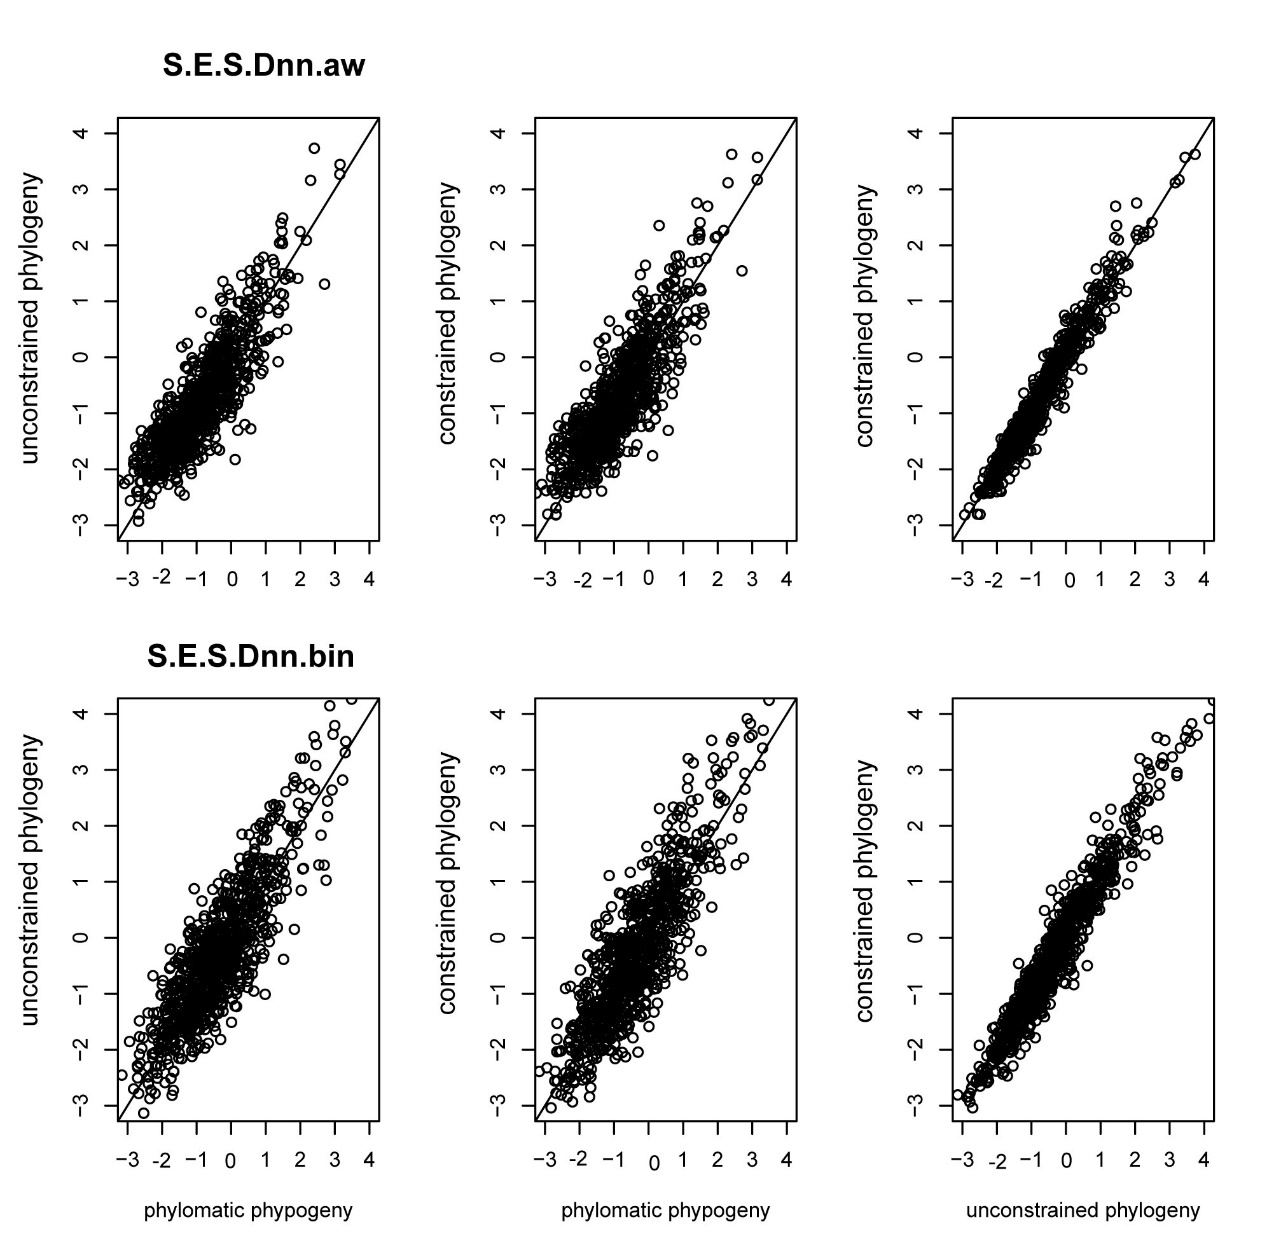


Fig. S4 Correlations between *S.E.S.Dnn.aw* and *S.E.S.Dnn.bin* of the three phylogenetic trees (the Phylomatic-generated tree, the unconstrained barcoding tree, and the constrained barcoding tree)

S1 Text: Text file containing different phylogenies generated in this study.

1. he ML tree of barcoding without a constrained tree

(((Nandina_domestica:0.3298649665,((((((((Mussaenda_pubescens:0.09741813951,(((Aidia_cochinchinensis:0.01900629097,(Damnacanthus_giganteus:0.4551775952,Aidia_canthioides:0.04009243021)24:0.01025158589)14:1.0000005e-06,Gardenia_jasminoides:0.06792594595)28:0.003684585545,(Diplospora_dubia:0.04801371706,Tarenna_mollissima:0.04550026098)60:0.004503678509)42:0.06335782764)50:0.02548479901,Emmenopterys_henryi:0.07108224061)70:0.1628145951,(Ehretia_longiflora:0.2748096904,((Fraxinus_insularis:0.01322549752,Ligustrum_quihoui:0.05257956034)100:0.1131771594,(Clerodendrum_cyrtophyllum:0.1973378847,(Callicarpa_kwangtungensis:1.0000005e-06,(Callicarpa_formosana:0.003974816781,(Callicarpa_giraldii:0.0132696983,Callicarpa_rubella:1.0000005e-06)69:0.005223185835)82:0.01324580384)100:0.05289526871)99:0.1162467662)95:0.06312194798)80:0.01378735111)66:0.0765328604,((Ilex_buergeri:0.01870052089,((Ilex_formosana:1.0000005e-06,Ilex_latifolia:1.0000005e-06)98:0.02041290188,(Ilex_rotunda:0.02391047548,((((Ilex_micrococca:0.003433483342,(Ilex_suaveolens:1.0000005e-06,Ilex_triflora:0.02932777503)57:0.006747933506)7:1.0000005e-06,(Ilex_chinensis:0.002475247164,Ilex_kwangtungensis:1.0000005e-06)18:6.264100872e-05)57:0.01747991058,((Ilex_ficoidea:1.0000005e-06,Ilex_tutcheri:0.001533017848)100:0.01595742127,Ilex_pubescens:0.01365791542)51:0.003740724342)23:0.003739252727,(Ilex_wilsonii:0.008987672818,Ilex_lohfauensis:0.007166271252)98:0.01156333835)32:0.006473173631)44:0.01502127647)87:0.02641225639)100:0.219715756,((Viburnum_erosum:0.01447546973,(Viburnum_setigerum:1.0000005e-06,Viburnum_fordiae:1.0000005e-06)4:1.0000005e-06)100:0.1471413239,(Aralia_decaisneana:0.02936899661,(Schefflera_heptaphylla:0.01649803537,(Kalopanax_septemlobus:0.01733781446,Dendropanax_dentiger:0.01676837488)95:0.004427214671)100:0.01735211491)100:0.1566561197)56:0.02816212333)38:0.01843801804)26:0.02142265213,((Ternstroemia_gymnanthera:0.07003258079,((Adinandra_milletii:0.004176175886,Adinandra_bockiana:0.007478582644)100:0.02688295274,(((Eurya_japonica:0.0008777826554,Eurya_nitida:1.0000005e-06)99:0.004437294738,(Eurya_loquaiana:1.0000005e-06,(Eurya_muricata:0.003589796559,Eurya_hebeclados:1.0000005e-06)21:1.0000005e-06)98:0.003510106804)100:0.003490960998,Eurya_distichophylla:0.006327611678)100:0.02295567579)100:0.05196185603)100:0.02709381088,((((Camellia_sinensis:0.09341220163,((Camellia_salicifolia:0.008307934027,Camellia_euryoides:0.00440348906)67:0.01792695344,(Camellia_brevistyla:0.03065734902,Camellia_oleifera:1.0000005e-06)50:1.0000005e-06)100:0.02685996601)100:0.1137628894,(Stewartia_sinensis:0.06250955332,(Schima_superba:0.004565582439,Schima_argentea:0.003335460809)100:0.0756767296)60:0.01641304306)100:0.03968129491,((Maesa_japonica:0.12186427,(Myrsine_africana:0.01462428376,Myrsine_seguinii:0.00516484964)100:0.1771639092)100:0.09503722539,(Enkianthus_quinqueflorus:0.1057403864,((((Vaccinium_mandarinorum:0.002535540885,Vaccinium_bracteatum:0.005537477799)100:0.007443522147,Vaccinium_carlesii:0.009734093053)100:0.06184741009,Lyonia_ovalifolia:0.05351409477)100:0.03759058011,(((Rhododendron_latoucheae:0.003481258026,((Rhododendron_stamineum:1.0000005e-06,Rhododendron_moulmainense:0.0008480513935)98:0.0008310210183,Rhododendron_championiae:0.006206826558)99:0.002689032153)100:0.01485332005,((Rhododendron_mariesii:0.005801126508,Rhododendron_simsii:0.007631460798)94:0.004387564788,Rhododendron_levinei:0.0206302155)50:0.001665313455)53:0.0009311328726,Rhododendron_ovatum:0.01543463502)100:0.06909045648)100:0.1021238243)100:0.05685035996)47:0.01548536214)26:0.01064979977,((Symplocos_paniculata:0.03520968119,((Symplocos_groffii:1.0000005e-06,Symplocos_anomala:1.0000005e-06)100:0.007550347358,((Symplocos_lancifolia:0.008813445551,((Symplocos_adenopus:0.00600081875,Symplocos_stellaris:0.0008411123808)80:0.002369949382,(Symplocos_cochinchinensis:0.01435009662,Symplocos_sumuntia:0.006817414869)52:0.000799389971)52:0.001779512761)36:0.0004858007802,Symplocos_heishanensis:0.007834059072)68:0.003462659816)92:0.01702697671)100:0.117783298,((Alniphyllum_fortunei:0.09023315618,(Pterostyrax_corymbosus:0.009833947229,Halesia_macgregorii:0.024169887)100:0.04545694534)100:0.04119817114,(Styrax_suberifolius:0.05040505067,(Styrax_confusus:0.003839736214,Styrax_japonicus:0.003166221124)100:0.01136998019)100:0.1850813279)100:0.0576934217)46:0.009249446666)55:0.009885183501)100:0.115356156)25:0.01286060294,((Hydrangea_macrophylla:0.09929975179,(Alangium_chinense:0.0257461893,Alangium_kurzii:0.01399893409)100:0.1758586697)12:1.0000005e-06,Nyssa_sinensis:0.18829046)87:0.03135603093)24:0.06083831934,Euscaphis_japonica:0.2722329308)16:0.02066826169,((((Cornus_controversa:0.08781848471,Cornus_kousa:0.1345462825)91:0.1236295925,((Lasianthus_japonicus:0.01822600168,Lasianthus_chinensis:0.01715244928)100:0.5488274796,(Diospyros_lotus:0.209666093,(Diospyros_morrisiana:0.02628635823,Diospyros_glaucifolia:0.02876560615)100:0.04520457096)100:0.2194522444)31:0.005991971439)40:0.05535533314,(Schoepfia_jasminodora:1.0000005e-06,Schoepfia_chinensis:1.0000005e-06)100:0.5937124107)12:0.01277466162,((((((Tapiscia_sinensis:0.1497205774,Bretschneidera_sinensis:0.2205330791)88:0.04106568316,((((Choerospondias_axillaris:0.1234098659,(Toxicodendron_vernicifluum:0.019689741,(Toxicodendron_sylvestre:1.0000005e-06,Toxicodendron_succedaneum:1.0000005e-06)100:0.02052891187)100:0.1533709954)100:0.05166952483,(Tetradium_glabrifolium:0.1290515906,Toona_ciliata:0.1387930578)100:0.07794427512)76:0.008073621161,(Eurycorymbus_cavaleriei:0.1301532461,(Acer_davidii:0.02257863424,((Acer_oliverianum:0.002462374292,((Acer_lucidum:1.0000005e-06,Acer_fabri:1.0000005e-06)99:0.0008406954021,(Acer_palmatum:0.007446737856,Acer_cordatum:0.002033066929)90:0.002329170723)84:0.001734108275)71:0.00581032669,Acer_campbellii:0.007048060177)100:0.02826407909)100:0.1000894371)100:0.07418670056)100:0.08696862266,(Blastus_cochinchinensis:0.5974718574,Syzygium_buxifolium:0.1610539595)100:0.1310025415)65:0.01628120066)49:0.01894459867,(((((((Macaranga_tanarius:0.05730457964,Mallotus_philippensis:0.05060424841)100:0.1235129262,Triadica_cochinchinensis:0.134244283)100:0.0159294721,Vernicia_montana:0.1339936197)100:0.06024288546,Garcinia_multiflora:0.4485713012)70:0.01319551614,(Erythroxylum_sinense:0.342900212,(Antidesma_japonicum:0.02854415036,Antidesma_bunius:0.03167472171)100:0.3197670942)81:0.02332909619)100:0.08362368862,((((Euonymus_fortunei:0.001733815504,(Meliosma_myriantha:1.0000005e-06,(Meliosma_rigida:0.00377226952,Meliosma_oldhamii:0.01592499211)90:0.009119116545)99:0.1524628611)79:0.2802258754,((Euonymus_euscaphis:1.0000005e-06,Euonymus_myrianthus:1.0000005e-06)100:0.02804510216,((Euonymus_alatus:0.04017570894,Euonymus_centidens:0.01598119166)31:0.004002319657,Euonymus_nitidus:0.01429969452)61:0.01159688116)83:0.07163967194)11:0.01231948104,Celastrus_aculeatus:0.07771941354)20:0.2251114981,(Sloanea_sinensis:0.03606957384,(((Elaeocarpus_japonicus:1.0000005e-06,Elaeocarpus_sylvestris:1.0000005e-06)100:0.001529492032,Elaeocarpus_chinensis:0.005978511675)100:0.03786187229,Elaeocarpus_duclouxii:0.04970606782)100:0.08328794259)100:0.1772402055)8:0.01732771038)20:0.03430139159,((((((Dalbergia_hupeana:0.2488620799,Lespedeza_davidii:0.3517899466)100:0.007773505059,Ormosia_henryi:0.09669807114)100:0.08569869608,(Caesalpinia_decapetala:0.09233871346,(Albizia_julibrissin:0.004189177147,Albizia_kalkora:1.0000005e-06)100:0.1733575534)93:0.06496548327)92:0.06049950126,Polygala_fallax:0.4513259367)100:0.140908571,(((Maclura_cochinchinensis:0.1448435017,((((Ficus_formosana:0.001015193478,Ficus_pandurata:0.002017011438)100:0.00920775415,Ficus_heteromorpha:0.001016993433)38:0.00100944283,Ficus_variolosa:1.0000005e-06)58:0.003132401504,Ficus_sarmentosa:0.02999103272)100:0.1259214442)100:0.173220887,Elaeagnus_pungens:0.3160661671)97:0.03531977058,((Prunus_phaeosticta:0.05009807344,(Prunus_spinulosa:0.01112666122,Prunus_serrulata:0.0107670507)68:0.01881302661)100:0.05948478019,(Pyrus_betulifolia:0.07021875068,((((Malus_sieboldii:0.03349345464,Malus_hupehensis:1.0000005e-06)100:0.02042319353,(Photinia_prunifolia:0.005514472989,(Photinia_glabra:0.004066732866,Photinia_bodinieri:0.00689484675)62:0.00155488768)98:0.02096443596)77:0.01087907857,(Sorbus_folgneri:0.0173158346,((Photinia_schneideriana:0.003675531079,Photinia_beauverdiana:0.004078903306)94:0.005151554849,Photinia_parvifolia:0.00363620879)100:0.01464951111)46:0.004027776053)48:0.003794597223,(Eriobotrya_cavaleriei:0.01721477691,Rhaphiolepis_indica:0.01410697626)100:0.01932593811)29:1.0000005e-06)100:0.08623793833)100:0.1218097969)100:0.06401983095)96:0.002255069671,((Fagus_longipetiolata:0.1104472296,(((Castanopsis_tibetana:0.003730976605,(Castanopsis_carlesii:1.0000005e-06,Castanopsis_eyrei:1.0000005e-06)86:0.004599175818)23:1.0000005e-06,((Castanopsis_lamontii:0.006726116923,(Castanopsis_faberi:0.002685825828,Castanea_henryi:1.0000005e-06)51:0.001217505771)16:0.003443742359,Castanopsis_sclerophylla:0.0157028497)27:0.002078137861)50:0.008177088551,(((((Quercus_sessilifolia:1.0000005e-06,(Quercus_ciliaris:1.0000005e-06,Quercus_multinervis:1.0000005e-06)34:1.0000005e-06)95:1.0000005e-06,Quercus_glauca:1.0000005e-06)98:0.004137342666,(Quercus_myrsinifolia:0.00337705435,(Quercus_acutissima:0.005660591259,Quercus_chenii:0.002796377435)99:0.01292193295)63:0.003307262658)83:0.01284606745,Lithocarpus_litseifolius:0.0233541769)55:0.005800746919,(Castanopsis_fargesii:0.1060335777,Lithocarpus_skanianus:0.08014241021)67:0.02338373503)34:0.003576534246)100:0.1590979384)100:0.06160109725,((Carpinus_viminea:0.003419492777,Carpinus_londoniana:0.001904002529)100:0.1303504389,(((Platycarya_strobilacea:0.06259238588,Cyclocarya_paliurus:0.01260454019)96:0.007750891435,Engelhardtia_roxburghiana:0.07077699213)100:0.09992277825,Myrica_rubra:0.1196205348)69:0.01578276379)99:0.04577583723)100:0.08491859605)95:0.02023137958)15:0.01984989819)6:0.01039035423,(Turpinia_arguta:0.05558774393,Turpinia_montana:0.05609082569)100:0.1702272449)19:0.08780183416,(((Daphniphyllum_calycinum:0.00298870548,(Daphniphyllum_macropodum:0.008602542964,Daphniphyllum_oldhamii:0.001449122358)100:0.01656461063)100:0.1751530469,(Loropetalum_chinense:0.1225920356,(Liquidambar_formosana:0.005238415283,Liquidambar_acalycina:0.003411995695)100:0.1429016083)97:0.02605436935)96:0.02671466862,Itea_chinensis:0.2265127304)91:0.03578041945)8:0.01938559173,(Helicia_reticulata:0.005579031535,Helicia_cochinchinensis:1.0000005e-06)100:0.5042964108)16:0.01638365204)12:0.2807109234)21:0.1376157616)17:0.08505550837,(((((Litsea_coreana:0.02419086853,Lindera_aggregata:0.01994996226)22:0.0004311076875,((Neolitsea_chui:0.008117293926,(Neolitsea_levinei:0.001363710903,Neolitsea_aurata:0.009064623932)73:0.003116639229)100:0.01520840993,((Sassafras_tzumu:0.01213324227,(Cinnamomum_micranthum:0.0066899493,Cinnamomum_porrectum:0.01225561404)90:0.01341495441)55:0.007360248388,(((Lindera_communis:0.03861255335,Lindera_glauca:0.01645047514)70:0.008884050439,((Cinnamomum_austrosinense:0.004907882872,Cinnamomum_subavenium:0.003770007174)100:0.02906609287,(Machilus_nanmu:0.004331504065,(Phoebe_bournei:0.02550658553,((Machilus_phoenicis:0.008963218462,Machilus_velutina:0.001040883141)45:1.0000005e-06,((Machilus_leptophylla:1.0000005e-06,Machilus_thunbergii:1.0000005e-06)71:0.0009540828558,(Machilus_oreophila:1.0000005e-06,Machilus_pauhoi:0.001915918024)44:1.0000005e-06)85:0.001941321567)97:0.003297294422)45:0.00344012791)82:0.01063257204)45:0.006624108361)16:0.002002935149,(Lindera_erythrocarpa:0.02244937837,Litsea_cubeba:0.006838699158)71:0.004920557579)25:0.004173680617)52:0.002029224216)33:0.00207043356)100:0.02646152482,Litsea_elongata:0.05314674129)100:0.03993276074,Lindera_reflexa:0.1767377711)99:0.1512046672,((((Magnolia_maudiae:0.00722155663,Magnolia_foveolata:0.004857438296)21:1.0000005e-06,(Magnolia_figo:0.003684863317,(Magnolia_odora:0.07777145334,(Magnolia_chapensis:0.06463424914,Magnolia_denudata:0.07216083188)40:0.01189886777)46:0.02267508072)20:0.002251734641)20:0.02829097064,Magnolia_fordiana:0.00127931338)94:0.05429340981,Magnolia_cylindrica:0.3855471074)30:0.1294662055)23:0.04866325164)100:0.6612575186,(((Cunninghamia_lanceolata:0.2064822003,Taxus_wallichiana:0.2537675495)100:0.2318907193,Nageia_nagi:0.6215901136)100:0.2088492625,(Pinus_massoniana:0.03843669952,Pinus_taiwanensis:0.02032132714)100:0.4492324309)100:0.6612575186);

(2) the ML tree of barcoding with a constrained tree

(((((Litsea_elongata:0.05440530506395584165,((Lindera_aggregata:0.01986255145715131940,Litsea_coreana:0.02430928797192688159)27:0.00047855701411602004,((Neolitsea_chui:0.00814413128710621444,(Neolitsea_aurata:0.00909486599242091687,Neolitsea_levinei:0.00136717711803322557)80:0.00312577913186555881)100:0.01527412853814159172,(((Litsea_cubeba:0.00681014370428490584,Lindera_erythrocarpa:0.02251862087237669133)68:0.00493142512151487598,((((Phoebe_bournei:0.02553880299662782821,((Machilus_velutina:0.00104359185158821874,Machilus_phoenicis:0.00898275752321951206)61:0.00000100000050002909,((Machilus_leptophylla:0.00000100000050002909,Machilus_thunbergii:0.00000100000050002909)64:0.00095472968052664608,(Machilus_pauhoi:0.00191946494055040087,Machilus_oreophila:0.00000100000050002909)40:0.00000100000050002909)84:0.00194352336405841184)94:0.00330321118221018955)53:0.00343506230493499090,Machilus_nanmu:0.00434845611771851430)79:0.01061369012959986757,(Cinnamomum_subavenium:0.00380996896870964847,Cinnamomum_austrosinense:0.00473111148088582907)100:0.02930181088097482539)41:0.00661297876811947367,(Lindera_communis:0.03882825068319130379,Lindera_glauca:0.01648918423594896918)69:0.00893491377766594645)11:0.00204118662267240058)21:0.00416615909970120563,(Sassafras_tzumu:0.01212872167640112291,(Cinnamomum_micranthum:0.00671367111364673877,Cinnamomum_porrectum:0.01229512448653565480)90:0.01348750770709984496)54:0.00737811381933431865)47:0.00202976154026545709)26:0.00207678332172649876)100:0.02551923160214842473)100:0.03913863187772639862,Lindera_reflexa:0.18005606411319630134)100:0.17278795167263227839,((Magnolia_maudiae:0.00589386668030581103,(Magnolia_foveolata:0.00475827568841600320,((Magnolia_odora:0.07836854154117643689,(Magnolia_chapensis:0.06510555784527695400,(Magnolia_fordiana:0.00354582351831449075,Magnolia_denudata:0.06100212547395389429)28:0.01170461331142894253)18:0.01178999827395993058)24:0.02306129970457448941,Magnolia_figo:0.00355736617512590093)16:0.00229020487965506982)20:0.00150412694205074140)96:0.13886633114144034118,Magnolia_cylindrica:0.34702602087557188337)100:0.09502016121334265486)100:0.14787231712872037082,((((Meliosma_oldhamii:0.01092452383391310025,(Meliosma_myriantha:0.00301840339010225108,Meliosma_rigida:0.00211470307332626900)84:0.00649156829510809559)100:0.34636140745784610440,(Helicia_reticulata:0.00552657848621577238,Helicia_cochinchinensis:0.00000100000050002909)100:0.42227671606473765609)100:0.00000100000050002909,Nandina_domestica:0.52525234449451951857)100:0.00219769063443734031,((((((Daphniphyllum_oldhamii:0.00150946127062689993,Daphniphyllum_macropodum:0.00860311565239034459)100:0.01642055528523403418,Daphniphyllum_calycinum:0.00291811635717173154)100:0.17530313793210169915,((Liquidambar_acalycina:0.00340639331212999868,Liquidambar_formosana:0.00537805463948700085)100:0.15022330509445622204,Loropetalum_chinense:0.12405879545659156959)100:0.02636275912328599896)100:0.02562329872460817129,Itea_chinensis:0.22278144056367144010)100:0.03506872660734375313,(((Euscaphis_japonica:0.34738194120086685057,(Turpinia_arguta:0.06478290178236580099,Turpinia_montana:0.05510467158665911802)64:0.00000100000050002909)100:0.17498889437733661234,((Blastus_cochinchinensis:0.62202874767686699986,Syzygium_buxifolium:0.15232014911793628764)100:0.15921911081549713907,(Tapiscia_sinensis:0.20512593778262747102,(Bretschneidera_sinensis:0.24433738788491421445,((Choerospondias_axillaris:0.12337725830354476231,(Toxicodendron_vernicifluum:0.01952061216839498167,(Toxicodendron_succedaneum:0.00000100000050002909,Toxicodendron_sylvestre:0.00000100000050002909)100:0.02049967499285575145)100:0.15551158656038752137)100:0.05419327770356525964,(((((Acer_oliverianum:0.00244724990144248736,((Acer_lucidum:0.00000100000050002909,Acer_fabri:0.00000100000050002909)97:0.00083237659652498090,(Acer_palmatum:0.00739131217193368488,Acer_cordatum:0.00202068564128798792)84:0.00230955811581833427)80:0.00171847655914214689)75:0.00582472355435193889,Acer_campbellii:0.00778041602699916165)100:0.02797493570290911571,Acer_davidii:0.02243047940182132591)100:0.09931365705131188493,Eurycorymbus_cavaleriei:0.12904909634482095160)100:0.07861228553068505542,(Toona_ciliata:0.14401594649759427713,Tetradium_glabrifolium:0.12997483634862297408)100:0.08063310826759408079)100:0.00083706203591133257)100:0.09000321264768852692)100:0.01010285785154816166)100:0.01880689220749652904)100:0.00624841236324053320)100:0.00386074403274450691,((((((Euonymus_euscaphis:0.00000100000050002909,Euonymus_myrianthus:0.00000100000050002909)100:0.02811892461986438552,((Euonymus_centidens:0.01601980683923226456,Euonymus_alatus:0.04005450371782205005)37:0.00391727463086963181,Euonymus_nitidus:0.01419844336291806869)56:0.01140257995776102623)83:0.06937227323697697789,Euonymus_fortunei:0.28521205581885800129)76:0.01498785574639998133,Celastrus_aculeatus:0.08559993048016995010)100:0.24011513660278746563,((Sloanea_sinensis:0.03645381147714559650,(((Elaeocarpus_sylvestris:0.00000100000050002909,Elaeocarpus_japonicus:0.00000100000050002909)100:0.00153697194336338354,Elaeocarpus_chinensis:0.00611274844848497083)100:0.03881959883357161828,Elaeocarpus_duclouxii:0.05116821181304705840)100:0.08573034922813999037)100:0.19549712069992244978,((Antidesma_japonicum:0.02767916184172787911,Antidesma_bunius:0.03231754106956441497)100:0.35501547543840783483,((Erythroxylum_sinense:0.35764029153246618131,Garcinia_multiflora:0.45790785424269547788)100:0.01083107061928309696,(((Macaranga_tanarius:0.05709986159472194012,Mallotus_philippensis:0.04990032645734492761)100:0.12228959296451930028,Triadica_cochinchinensis:0.14030423333258032481)31:0.01641883635300351099,Vernicia_montana:0.13208596529489743943)100:0.07339405052423848830)100:0.00000100000050002909)100:0.08717191949228901560)100:0.00000100000050002909)100:0.03748075745642594908,(((((((((Castanea_henryi:0.00000100000050002909,Castanopsis_faberi:0.00256185148002698948)42:0.00188633131023001636,Castanopsis_lamontii:0.00636037387624235721)15:0.00343275129758825086,Castanopsis_sclerophylla:0.01565906283615327646)22:0.00188439019827326987,(Castanopsis_tibetana:0.00409027178051977591,(Castanopsis_eyrei:0.00000100000050002909,Castanopsis_carlesii:0.00000100000050002909)87:0.00420792088454489781)19:0.00053449953185785660)48:0.00805586441032915719,((((((Quercus_ciliaris:0.00000100000050002909,Quercus_multinervis:0.00000100000050002909)30:0.00000100000050002909,Quercus_sessilifolia:0.00000100000050002909)93:0.00000100000050002909,Quercus_glauca:0.00000100000050002909)98:0.00416285573976351696,(Quercus_myrsinifolia:0.00335731974575379172,(Quercus_acutissima:0.00569822407702892230,Quercus_chenii:0.00281449070939436378)100:0.01304117296349261400)63:0.00322697928678859726)90:0.01279749084569643466,Lithocarpus_litseifolius:0.02326659550944474783)53:0.00570559167355426215,(Castanopsis_fargesii:0.10663730455643399830,Lithocarpus_skanianus:0.07986283791056177084)65:0.02360314635832290106)34:0.00354651601057243962)100:0.16091633935515115006,Fagus_longipetiolata:0.11069346504042423818)100:0.06455751645546013717,((Myrica_rubra:0.11801401665539387742,(Engelhardtia_roxburghiana:0.07070285416118753108,(Platycarya_strobilacea:0.06351419996785180599,Cyclocarya_paliurus:0.01200255767175688326)100:0.00783979969467385636)100:0.10097776829840796053)100:0.01569147571834837024,(Carpinus_londoniana:0.00187480159856190441,Carpinus_viminea:0.00339770883854097639)100:0.12986677449566347287)100:0.04314709071803432550)100:0.08602931913223292593,((Elaeagnus_pungens:0.32038040353768787449,(Maclura_cochinchinensis:0.14534147115661069649,((((Ficus_pandurata:0.00200725487456310031,Ficus_formosana:0.00101119430640487064)100:0.00917326575925107510,Ficus_heteromorpha:0.00101212773095857734)42:0.00100549746084340288,Ficus_variolosa:0.00000100000050002909)56:0.00320855701420131624,Ficus_sarmentosa:0.02969674738508067471)100:0.12732026235936044767)100:0.17668724731892748725)100:0.04053909264290386782,((Prunus_serrulata:0.00765634208640886618,(Prunus_spinulosa:0.00808259353454440430,Prunus_phaeosticta:0.06567197287054955812)59:0.00606774404911435052)100:0.06568510059327591077,(((Eriobotrya_cavaleriei:0.01697367966031554029,Rhaphiolepis_indica:0.01417388614066101248)100:0.01911763938538737009,Pyrus_betulifolia:0.07002563772697222022)10:0.00000100000050002909,((((Photinia_glabra:0.00414182623417071530,Photinia_bodinieri:0.00758666078319704049)50:0.00140759251134553454,Photinia_prunifolia:0.00555381606877594029)94:0.02093085175915131851,(Malus_hupehensis:0.00000100000050002909,Malus_sieboldii:0.03231403588653354586)100:0.02024950201805071973)74:0.01094719799592172062,(Sorbus_folgneri:0.01725014365628502883,(Photinia_parvifolia:0.00365584002972135736,(Photinia_schneideriana:0.00366092743484385582,Photinia_beauverdiana:0.00406811879495733858)93:0.00508925955911299337)100:0.01460164176584567014)51:0.00392300955281071288)49:0.00382663492770493954)100:0.09190851127435660517)100:0.12032347488943509473)100:0.06669080035011781815)100:0.00000100000050002909,(Polygala_fallax:0.46641822848539798985,(((Lespedeza_davidii:0.35902410040776977507,Dalbergia_hupeana:0.24864728360030927123)27:0.01299232912570321211,Ormosia_henryi:0.10524758148079720044)100:0.08576314098219826876,(Caesalpinia_decapetala:0.10377060735475719666,(Albizia_kalkora:0.00000100000050002909,Albizia_julibrissin:0.00436315314956404326)100:0.17929562709619553673)97:0.06218518822151414965)100:0.06319905070751929976)100:0.14173990875033973258)100:0.02132439683378724304)100:0.02115641506905336852)100:0.09160758359252037242)100:0.04720675251260653127,((Schoepfia_chinensis:0.00000100000050002909,Schoepfia_jasminodora:0.00000100000050002909)100:0.61898317091566856796,(((((Alangium_chinense:0.02590016027463274556,Alangium_kurzii:0.01458281185593082903)100:0.12948384835728118936,(Cornus_kousa:0.25002525056289759409,Cornus_controversa:0.08078787897978899346)87:0.11327911408648244640)100:0.05710555864031163775,(Nyssa_sinensis:0.19424644501575458189,Hydrangea_macrophylla:0.10963463325939676318)100:0.00000100000050002909)100:0.04182191255610809982,((Maesa_japonica:0.12522612812694228213,(Myrsine_seguinii:0.00503185065245736508,Myrsine_africana:0.01454988826371270312)100:0.18446484152537279133)100:0.10336127002709549760,((((Diospyros_morrisiana:0.02314365883884974065,Diospyros_glaucifolia:0.03099387240503187133)99:0.05770082025803754955,Diospyros_lotus:0.20265129723313257681)100:0.43703628442860475989,((Ternstroemia_gymnanthera:0.07109392682563735189,((Adinandra_bockiana:0.00749333946439059012,Adinandra_milletii:0.00408570252700279565)100:0.02693266510820095661,(Eurya_distichophylla:0.00630140226248951125,((Eurya_nitida:0.00000100000050002909,Eurya_japonica:0.00087265067095366057)98:0.00441479515668202153,((Eurya_hebeclados:0.00000100000050002909,Eurya_loquaiana:0.00000100000050002909)78:0.00000100000050002909,Eurya_muricata:0.00355625603644913650)98:0.00348431727600457620)98:0.00345976951148060582)100:0.02275241090636686073)100:0.05140323726580652702)100:0.03078470082211791706,((Stewartia_sinensis:0.06632475871700189984,(Schima_argentea:0.00333277905428121983,Schima_superba:0.00456451427169113702)100:0.07446830789966328579)43:0.01530080464188698225,(Camellia_sinensis:0.09311664788095729006,((Camellia_salicifolia:0.00814350724072570448,Camellia_euryoides:0.00432870100190653993)77:0.01805102943081917169,(Camellia_brevistyla:0.03083387898511245201,Camellia_oleifera:0.00000100000050002909)51:0.00000100000050002909)100:0.02789138825362639726)100:0.11479707642214057040)100:0.04917548181231640864)100:0.00325352699358069436)100:0.00000100000050002909,((((Symplocos_anomala:0.00000100000050002909,Symplocos_groffii:0.00000100000050002909)100:0.00768396365456222238,(Symplocos_heishanensis:0.00775317191009821261,(Symplocos_lancifolia:0.00880444413812762200,((Symplocos_adenopus:0.00596593334690853540,Symplocos_stellaris:0.00083354124736626650)74:0.00228901823398842616,(Symplocos_cochinchinensis:0.01425709482265860063,Symplocos_sumuntia:0.00683149815620018742)49:0.00079814327594059445)54:0.00176946334690126789)43:0.00044920297714277051)61:0.00338822281880515061)90:0.01631952523188378093,Symplocos_paniculata:0.03588726091213829961)100:0.12566624175554361176,(((Styrax_suberifolius:0.05192799127968791145,(Styrax_confusus:0.00387438053854144817,Styrax_japonicus:0.00304272027003417217)96:0.00964724576530006338)100:0.18966633559811632570,((Halesia_macgregorii:0.02296928514970534782,Pterostyrax_corymbosus:0.01019528436313550147)100:0.04622079560320382918,Alniphyllum_fortunei:0.09118191450945566101)99:0.04249050633574412428)100:0.06515467261306706614,(Enkianthus_quinqueflorus:0.10832501107962498599,((Rhododendron_ovatum:0.01473135381938740253,(((Rhododendron_mariesii:0.00588162897538158265,(Rhododendron_simsii:0.00290780337312303684,Rhododendron_pulchrum:0.00707791509026358540)100:0.00472142445349181799)96:0.00430155826377913442,Rhododendron_levinei:0.02047397313146293724)56:0.00164358550337448872,(((Rhododendron_moulmainense:0.00083952577067433341,Rhododendron_stamineum:0.00000100000050002909)95:0.00082284066435396358,Rhododendron_championiae:0.00614720353893836568)99:0.00266227091356071579,Rhododendron_latoucheae:0.00343809913963526257)100:0.01465410139715125383)61:0.00154456118450487976)100:0.06786337273460320285,(Lyonia_ovalifolia:0.05395997851982348853,(Vaccinium_carlesii:0.00966449423358117787,(Vaccinium_bracteatum:0.00549896153750948670,Vaccinium_mandarinorum:0.00251972286295640193)100:0.00741965976105967307)100:0.06048501817937887437)100:0.03823541885512159871)100:0.10501457794877203100)100:0.07354446103903955478)100:0.00000100000050002909)100:0.00833027088850623286)100:0.00233392182127104518)100:0.11154055179356532623)100:0.00000100000050002909,(((((Ilex_rotunda:0.02390683364856399304,((Ilex_lohfauensis:0.00713544748939412641,Ilex_wilsonii:0.00893857911166685316)99:0.01148397001942014391,((((Ilex_kwangtungensis:0.00000100000050002909,Ilex_micrococca:0.00249712571137309649)55:0.00127004347742855090,(Ilex_triflora:0.03083877119624334889,Ilex_suaveolens:0.00000100000050002909)57:0.00741014948340541248)28:0.00000100000050002909,Ilex_chinensis:0.00251423193792990086)52:0.01736968713596787756,(Ilex_pubescens:0.01358472920458731782,(Ilex_tutcheri:0.00156056451063360936,Ilex_ficoidea:0.00000100000050002909)100:0.01584719978676602317)53:0.00373202844218577722)17:0.00370111721590861984)27:0.00633050181706534560)47:0.01490991716618945279,(Ilex_latifolia:0.00000100000050002909,Ilex_formosana:0.00000100000050002909)99:0.02044104854670468485)90:0.02619274849567098870,Ilex_buergeri:0.01777134367506513768)100:0.21785338944116264259,((Viburnum_erosum:0.01441547869871275325,(Viburnum_setigerum:0.00000100000050002909,Viburnum_fordiae:0.00000100000050002909)13:0.00000100000050002909)100:0.14720698433690695972,((Schefflera_heptaphylla:0.01651048582086388911,(Dendropanax_dentiger:0.01679067857215632564,Kalopanax_septemlobus:0.01723687028074567806)93:0.00444334111811156129)99:0.01725503698385605703,Aralia_decaisneana:0.02933381514853649480)100:0.16261783732535803337)100:0.02926321778441596730)100:0.01576795822990223125,(Ehretia_longiflora:0.27910809524977586715,(((Emmenopterys_henryi:0.07424492091884733747,(((Diplospora_dubia:0.04943731403554273152,Tarenna_mollissima:0.04516193391628349485)50:0.00450767177831472819,((Gardenia_jasminoides:0.06813040548100253446,Aidia_canthioides:0.04900865611208717054)16:0.00000100000050002909,Aidia_cochinchinensis:0.02120097691266242812)43:0.00358124611643982453)84:0.06468300137949653528,Mussaenda_pubescens:0.09642933978781284554)76:0.02466316258227464753)33:0.01556450288791603326,(Damnacanthus_giganteus:0.31825169714722856273,(Lasianthus_chinensis:0.01256060374498565828,Lasianthus_japonicus:0.02288053640108508868)100:0.43819194173299097494)75:0.22201148518541141685)100:0.14869414503942468553,((Fraxinus_insularis:0.01371477109407332265,Ligustrum_quihoui:0.05318062509754570288)100:0.11194523124336949738,(Clerodendrum_cyrtophyllum:0.20399290152781626717,(Callicarpa_kwangtungensis:0.00000100000050002909,((Callicarpa_rubella:0.00000100000050002909,Callicarpa_giraldii:0.01323805424996528195)75:0.00521848783559419622,Callicarpa_formosana:0.00392166130075346023)86:0.01300641493728462231)100:0.05000919213585434953)100:0.12385508085095359165)100:0.07760424236965532407)100:0.00000100000050002909)100:0.08535003100339434712)100:0.03038921565771998332)100:0.30010881321618215756)100:0.00000100000050002909)100:0.12259427003738065931)100:0.11759987360228099651)100:0.66096057906145355698,((Pinus_massoniana:0.04205700668477521664,Pinus_taiwanensis:0.02073767679571898379)100:0.48677815661714857187,((Taxus_wallichiana:0.28157056814809539036,Cunninghamia_lanceolata:0.22401889128787122463)100:0.26396183634089559478,Nageia_nagi:0.66050890952507912424)100:0.21619105181833578322)100:0.66096057906145355698);

(3)the Phylomatic-generated tree

(((Pinus_massoniana:44.07528,Pinus_taiwanensis:44.07528):222.64092,((Taxus_wallichiana:158.6168,Cunninghamia_lanceolata:158.6168):72.26288,Nageia_nagi:230.87968)Cupressophyta:35.83653):85.51847,(((Cinnamomum_micranthum:34.77721,Cinnamomum_austrosinense:34.77721,(Cinnamomum_porrectum:7.873,Cinnamomum_subavenium:7.873):26.9042,(Lindera_aggregata:33.5181,(Litsea_coreana:11.85744,Litsea_elongata:11.85744):21.66066,((Machilus_phoenicis:5.66835,(Machilus_velutina:2.95568,(Machilus_pauhoi:1.96304,(Machilus_thunbergii:1.37939,(Machilus_leptophylla:1.06897,Machilus_oreophila:1.06897):0.31043):0.58365):0.99263):2.71267,(Phoebe_bournei:4.13384,Machilus_nanmu:4.13385):1.5345):22.70302,((((Lindera_communis:2.01894,Lindera_glauca:2.01894):1.19309,(Lindera_erythrocarpa:2.931,Litsea_cubeba:2.931):0.28103):0.35837,(Lindera_reflexa:3.15183,Sassafras_tzumu:3.15183):0.41857):2.63435,(Neolitsea_chui:2.60686,(Neolitsea_aurata:2.58066,Neolitsea_levinei:2.58065):0.0262):3.59789):22.16661):5.14675):1.2591):85.92321,(Magnolia_maudiae:59.80352,(Magnolia_fordiana:23.48669,((Magnolia_cylindrica:5.38294,Magnolia_denudata:5.38294):13.00139,(Magnolia_chapensis:16.65799,((Magnolia_foveolata:1.74537,Magnolia_figo:1.74537):2.83103,Magnolia_odora:4.5764):12.08159):1.72634):5.10236):36.31682)Magnoliaceae:60.8969):59.92788,((((Meliosma_myriantha:55.45264,(Meliosma_rigida:25.85287,Meliosma_oldhamii:25.85288):29.59976):78.95484,(Helicia_reticulata:7.78401,Helicia_cochinchinensis:7.78401):126.62346):1.68465,Nandina_domestica:136.09213):0.80834,(((((Daphniphyllum_oldhamii:95.39587,Daphniphyllum_calycinum:95.39587,Daphniphyllum_macropodum:95.39586)Daphniphyllaceae:12.48093,((Liquidambar_acalycina:5.11876,Liquidambar_formosana:5.11876):100.62607,Loropetalum_chinense:105.74482):2.13196):0.21475,Itea_chinensis:108.09155)Saxifragales:9.5821,(((Euscaphis_japonica:32.2151,(Turpinia_montana:22.51858,Turpinia_arguta:22.51858):9.69652)Staphyleaceae:80.45331,((Blastus_cochinchinensis:82.89186,Syzygium_buxifolium:82.89183):28.13,(Tapiscia_sinensis:104.21226,(Bretschneidera_sinensis:101.42232,((Choerospondias_axillaris:47.74369,(Toxicodendron_vernicifluum:2.87617,(Toxicodendron_succedaneum:1.30494,Toxicodendron_sylvestre:1.30494):1.57123):44.86753):23.19704,(((Acer_lucidum:34.95437,Acer_cordatum:34.95437,((Acer_campbellii:19.72928,(Acer_oliverianum:18.67422,(Acer_fabri:6.82386,Acer_palmatum:6.82385):11.85036):1.05506):8.71406,Acer_davidii:28.44334):6.51103):11.14298,Eurycorymbus_cavaleriei:46.09736):22.5652,(Toona_ciliata:53.58245,Tetradium_glabrifolium:53.58246):15.0801):2.27819):30.48158):2.78994):6.80957):1.64658):4.86633,(((Euonymus_nitidus:67.74358,Euonymus_euscaphis:67.74358,Euonymus_centidens:67.74358,(Celastrus_aculeatus:58.19402,(Euonymus_fortunei:18.08268,(Euonymus_myrianthus:8.13246,Euonymus_alatus:8.13247):9.95022):40.11134):9.54957)Celastraceae:43.7473,((Sloanea_sinensis:70.15957,(Elaeocarpus_duclouxii:26.81464,Elaeocarpus_chinensis:26.81464,(Elaeocarpus_sylvestris:0.20917,Elaeocarpus_japonicus:0.20917):26.60547):43.34492)Elaeocarpaceae:41.22146,((Antidesma_japonicum:14.9742,Antidesma_bunius:14.97421):89.32081,((Erythroxylum_sinense:98.29413,Garcinia_multiflora:98.29413):2.81992,((Mallotus_philippensis:23.21387,Macaranga_tanarius:23.21385):47.75077,(Vernicia_montana:68.83279,Triadica_cochinchinensis:68.83278):2.13185):30.23942):3.18095):7.08601):0.10986):1.76773,((((Fagus_longipetiolata:40.40999,((Lithocarpus_skanianus:3.30372,Lithocarpus_litseifolius:3.30372,(Castanopsis_lamontii:2.22241,(Castanea_henryi:2.12713,(Castanopsis_eyrei:0.94544,(Castanopsis_carlesii:0.32013,((Castanopsis_tibetana:0.22521,Castanopsis_sclerophylla:0.22521):0.06006,(Castanopsis_fargesii:0.08999,Castanopsis_faberi:0.08998):0.19528):0.03486):0.62532):1.18169):0.09528):1.08131):1.23378,(Quercus_chenii:2.77794,((Quercus_myrsinifolia:0.71964,(Quercus_multinervis:0.39584,(Quercus_sessilifolia:0.38642,(Quercus_glauca:0.17328,Quercus_ciliaris:0.17328):0.21314):0.00942):0.3238):0.84845,Quercus_acutissima:1.56809):1.20985):1.75956):35.8725)Fagaceae:21.8954,((Myrica_rubra:46.99229,(Engelhardia_roxburghiana:38.3381,(Platycarya_strobilacea:22.74511,Cyclocarya_paliurus:22.74511):15.59298)Juglandaceae:8.6542):2.3812,(Carpinus_londoniana:1.59472,Carpinus_viminea:1.59472):47.77878):12.9319):43.63059,((Elaeagnus_pungens:74.23288,(Maclura_cochinchinensis:53.46282,(Ficus_sarmentosa:37.54599,Ficus_pandurata:37.54599,Ficus_heteromorpha:37.54599,Ficus_formosana:37.54599,Ficus_variolosa:37.54599):15.91684):20.77006):15.0442,((Prunus_phaeosticta:23.21589,(Prunus_spinulosa:9.89839,Prunus_serrulata:9.8984):13.31749):3.01031,((Photinia_parvifolia:2.13331,(Photinia_schneideriana:0.37274,Photinia_beauverdiana:0.37274):1.76058):2.28973,((Malus_sieboldii:1.26279,Malus_hupehensis:1.26279):2.44257,((Photinia_bodinieri:3.14818,(Photinia_prunifolia:1.01372,Photinia_glabra:1.01372):2.13446):0.27994,(Pyrus_betulifolia:1.95405,((Rhaphiolepis_indica:0.9156,Eriobotrya_cavaleriei:0.91559):0.62255,Sorbus_folgneri:1.53815):0.4159):1.47407):0.27724):0.71768):21.80315):63.05087)Rosales:16.6589):1.05941,(Polygala_fallax:72.04879,((Caesalpinia_decapetala:43.45221,(Albizia_kalkora:0.20936,Albizia_julibrissin:0.20936):43.24285):14.13008,(Dalbergia_hupeana:53.74536,(Ormosia_henryi:50.84671,Lespedeza_davidii:50.84673):2.89863):3.83694):14.46651)Fabales:34.9466):6.26322)Fabidae:4.27613)Rosidae:0.13891)Superrosidae:1.49186,((Schoepfia_jasminodora:38.92446,Schoepfia_chinensis:38.92446)Schoepfiaceae:77.77283,(((((Alangium_kurzii:8.54802,Alangium_chinense:8.54802):56.87059,(Cornus_kousa:50.23285,Cornus_controversa:50.23285):15.18576)Cornaceae:32.32185,(Nyssa_sinensis:87.87456,Hydrangea_macrophylla:87.87455):9.86592)Cornales:7.93534,((Maesa_japonica:54.03985,(Myrsine_africana:21.0378,Myrsine_seguinii:21.0378):33.00205)Primulaceae:31.53289,(((Diospyros_morrisiana:7.9599,(Diospyros_lotus:4.11426,Diospyros_glaucifolia:4.11426):3.84564):71.68437,((Ternstroemia_gymnanthera:43.87329,((Adinandra_millettii:27.48148,Adinandra_bockiana:27.48148):6.22463,(Eurya_distichophylla:21.01984,((Eurya_nitida:6.79316,Eurya_japonica:6.79315):6.15682,(Eurya_hebeclados:5.23647,(Eurya_muricata:1.89839,Eurya_loquaiana:1.89839):3.33808):7.71349):8.06987):12.68627):10.16717):27.95187,(Stewartia_sinensis:58.46481,((Schima_argentea:15.7097,Schima_superba:15.7097):41.36629,(Camellia_salicifolia:14.50123,Camellia_euryoides:14.50123,(Camellia_sinensis:13.05534,(Camellia_brevistyla:2.57966,Camellia_oleifera:2.57965):10.47568):1.44589):42.57476):1.38881)Theaceae:13.36034):7.81911):3.12388,((Symplocos_groffii:58.55668,Symplocos_adenopus:58.55668,(Symplocos_paniculata:40.87117,(Symplocos_anomala:27.5023,(Symplocos_sumuntia:27.1983,((Symplocos_lancifolia:6.21673,Symplocos_cochinchinensis:6.21674):3.31386,(Symplocos_heishanensis:8.23207,Symplocos_stellaris:8.23207):1.29852):17.66771):0.30399):13.36888):17.6855)Symplocaceae:23.62889,(((Alniphyllum_fortunei:51.80112,(Halesia_macgregorii:47.34919,Pterostyrax_corymbosus:47.3492):4.45193):12.17279,(Styrax_confusus:42.11933,(Styrax_suberifolius:41.30218,Styrax_japonicus:41.30217):0.81714):21.85458)Styracaceae:14.84333,(Enkianthus_quinqueflorus:62.05168,((Rhododendron_levinei:12.30662,Rhododendron_latoucheae:12.30662,(Rhododendron_ovatum:5.86108,((Rhododendron_moulmainense:1.43815,(Rhododendron_championiae:0.58694,Rhododendron_stamineum:0.58694):0.85121):3.5918,(Rhododendron_mariesii:3.6652,Rhododendron_simsii:3.66519):1.36475):0.83113):6.44555):31.19722,(Lyonia_ovalifolia:23.0471,(Vaccinium_mandarinorum:11.39166,Vaccinium_carlesii:11.39166,Vaccinium_bracteatum:11.39166):11.65543):20.45675):18.54784)Ericaceae:16.76556):3.36832):0.58258):2.80459):20.10307):1.93366,(((Ilex_tutcheri:65.83304,Ilex_lohfauensis:65.83304,Ilex_kwangtungensis:65.83304,Ilex_formosana:65.83304,Ilex_triflora:65.83304,(((Ilex_ficoidea:1.11709,Ilex_buergeri:1.11709):1.6793,Ilex_latifolia:2.79639):14.84027,((Ilex_suaveolens:6.52867,Ilex_chinensis:6.52867):5.32005,((Ilex_micrococca:4.37844,Ilex_rotunda:4.37843):1.61321,(Ilex_pubescens:2.96238,Ilex_wilsonii:2.96239):3.02926):5.85707):5.78795):48.19637)Aquifoliaceae:35.15624,((Viburnum_fordiae:60.0336,(Viburnum_erosum:5.32072,Viburnum_setigerum:5.32072):54.71289):36.2833,(Schefflera_heptaphylla:57.91497,((Dendropanax_dentiger:39.91446,Kalopanax_septemlobus:39.91446):13.45128,Aralia_decaisneana:53.36575):4.54923):38.40191):4.67238)Campanulidae:1.88221,(Ehretia_longiflora:74.99902,((((Lasianthus_chinensis:21.45738,Lasianthus_japonicus:21.45738):15.59578,Damnacanthus_giganteus:37.05316):10.59366,(Emmenopterys_henryi:32.95266,(Mussaenda_pubescens:26.16234,(Diplospora_dubia:9.85967,(Aidia_canthioides:8.10713,(Aidia_cochinchinensis:5.66641,Tarenna_mollissima:5.66643):2.44071,Gardenia_jasminoides:8.10712):1.75254):16.30268):6.79032):14.69415):25.72263,((Fraxinus_insularis:21.69339,Ligustrum_quihoui:21.69338):34.54716,(Callicarpa_kwangtungensis:22.48668,Callicarpa_formosana:22.48668,Clerodendrum_cyrtophyllum:22.48666,(Callicarpa_rubella:0.98096,Callicarpa_giraldii:0.98096):21.50573):33.75386):17.1289):1.62956):27.8725):4.73798)Asteridae:9.08781)Pentapetalae:2.46824)Gunneridae:17.73496)Eudicotyledoneae:43.72782):171.60639)Spermatophyta;
